# Supplementary material for: Spatio-temporal variations in surface Marine Carbonate System properties across the Western Mediterranean Sea using Volunteer Observing Ship data
Source: Copernicus journal article supplement (doi:10.5194/egusphere-2024-2709), 2024-10-07
Supplement: Supplementary file 1 [file egusphere-2024-2709-supplement.pdf]

*Supplementary Material*

**Spatio-temporal variations in surface Marine Carbonate System properties across the Western Mediterranean Sea using Volunteer Observing Ship data.**

David Curbelo-Hernández\*, David González-Santana, Aridane González-González, J. Magdalena Santana-Casiano and Melchor González-Dávila

<sup>1</sup> Instituto de Oceanografía y Cambio Global (IOCAG), Universidad de Las Palmas de Gran Canaria (ULPGC). Las Palmas de Gran Canaria, Spain.

\* Corresponding Author: david.curbelo@ulpgc.es

## Legend for Figures

Figure Sup1. Spatial distribution of the average SSS,  $A_T$ ,  $NA_T$  and  $NC_T$  calculated on a seasonal and annual basis every  $0.1^\circ$  longitude along the S section (left panels) and every  $0.25^\circ$  latitude along the E section (right panels). The 3-months periods January-March, April-June, July-September and October-December were considered as winter, spring, summer and autumn, respectively. Note the different scales used for  $A_T$ ,  $NA_T$  and  $CT$  due to significant variations between the S and E sections. Standard deviations are provided in Table S1 and indicate the range of variability among the study period.

Figure Sup2. Time-series of SST,  $fCO_{2,sw}$  and pH at S2 and S4 in the Alboran Sea within the five years of observations. The weekly average data was fitted to Eq. 10. The thermal and non-thermal terms of the average  $fCO_{2,sw}$  calculated by following the procedures of Takahashi et al., 2002 (T,02) and Fassbender et al., 2022 (F'22) and the  $pH_{19}$  are depicted. The coefficients  $a-f$ , the standard error of estimate and the  $r^2$  given by Eq. 10 are presented in Table S1.

Figure Sup3. Time-series of SST,  $fCO_{2,sw}$  and pH at E2, E3 and E6 along the eastern Iberian margin within the five years of observations. The weekly average data was fitted to Eq. 10. The thermal and non-thermal terms of the average  $fCO_{2,sw}$  calculated by following the procedures of Takahashi et al., 2002 (T,02) and Fassbender et al., 2022 (F'22) and the  $pH_{19}$  are depicted. The coefficients  $a-f$ , the standard error of estimate and the  $r^2$  given by Eq. 10 are presented in Table S1.

Figure Sup4. Time-series of SSS,  $C_T$ ,  $NC_T$ ,  $A_T$  and  $NA_T$  at S1-S5 and E1-E6 within the five years of observations. The weekly average data was fitted to Eq. 10. The thermal and non-thermal terms of the average  $fCO_{2,sw}$  calculated by following the procedures of Takahashi et al., 2002 (T,02) and Fassbender et al., 2022 (F'22) and the  $pH_{19}$  are depicted. The coefficients  $a-f$ , the standard error of estimate and the  $r^2$  given by Eq. 10 are presented in Table S1.

Figure Sup5. Temporal evolution of average  $\Delta fCO_2$  and wind speed calculated on a seasonal and annual basis for each year (2019-2023) at S1-S5. The 3-months periods January-March, April-June, July-September and October-December were considered as winter, spring, summer and autumn, respectively. The legend includes the interannual trends for  $\Delta fCO_2$  ( $\mu atm yr^{-1}$ ) and wind speed ( $m s^{-1} yr^{-1}$ ) based on linear regression of the seasonal and annual means. \*\*\* denotes that the trends are statistically significant at the 99% level of confidence, \*\* at the 95% level of confidence and \* at the 90% level of confidence. Standard deviations are presented in Table S4.

Figure Sup6. Temporal evolution of average  $\Delta fCO_2$  and wind speed calculated on a seasonal and annual basis for each year (2019-2023) at E1-E6. The 3-months periods January-March, April-June, July-September and October-December were considered as winter, spring, summer and autumn, respectively. The legend includes the interannual trends for  $\Delta fCO_2$  ( $\mu atm yr^{-1}$ ) and wind speed ( $m s^{-1} yr^{-1}$ ) based on linear regression of the seasonal and annual means. \*\*\* denotes that the trends are statistically significant at the 99% level of confidence, \*\* at the 95% level of confidence and \* at the 90% level of confidence. Standard deviations are presented in Table Sup4.

## Legend for Tables

Table Sup1. Coefficients  $a-f$ , standard error of estimate and  $r^2$  given by Eq. 10 for each variable. The standard error of each coefficient was calculated at the 95% level of confidence and is provided.

Table Sup2. Standard deviation of average SST, SSS,  $f\text{CO}_{2,\text{sw}}$ , pH,  $\text{pH}_{19}$ ,  $C_T$ ,  $\text{NC}_T$ ,  $A_T$  and  $\text{NA}_T$  calculated on a seasonal and annual basis every  $0.1^\circ$  longitude along the S section and every  $0.25^\circ$  latitude along the E section. Means are represented in Figure 2 and Sup1.

Table Sup3. Standard errors of  $d\text{fCO}_2^{\text{SST}}$ ,  $d\text{fCO}_2^{\text{SSS}}$ ,  $d\text{fCO}_2^{\text{AT}}$ ,  $d\text{fCO}_2^{\text{CT}}$ ,  $\frac{d\text{fCO}_{2,\text{sw}}}{dt}$  (sum) and  $\frac{d\text{fCO}_{2,\text{sw}}}{dt}$  (obs) for each year (2019-2023) at S1-S5 and E1-E6.

Table Sup4. Standard deviation of  $\text{CO}_2\text{f}$ ,  $\Delta\text{fCO}_2$  and wind speed calculated on a seasonal and annual basis for each year (2019-2023) at S1-S5 and E1-E6. Means are represented in Figure 7, Sup5 and S6.

Fig. Sup1

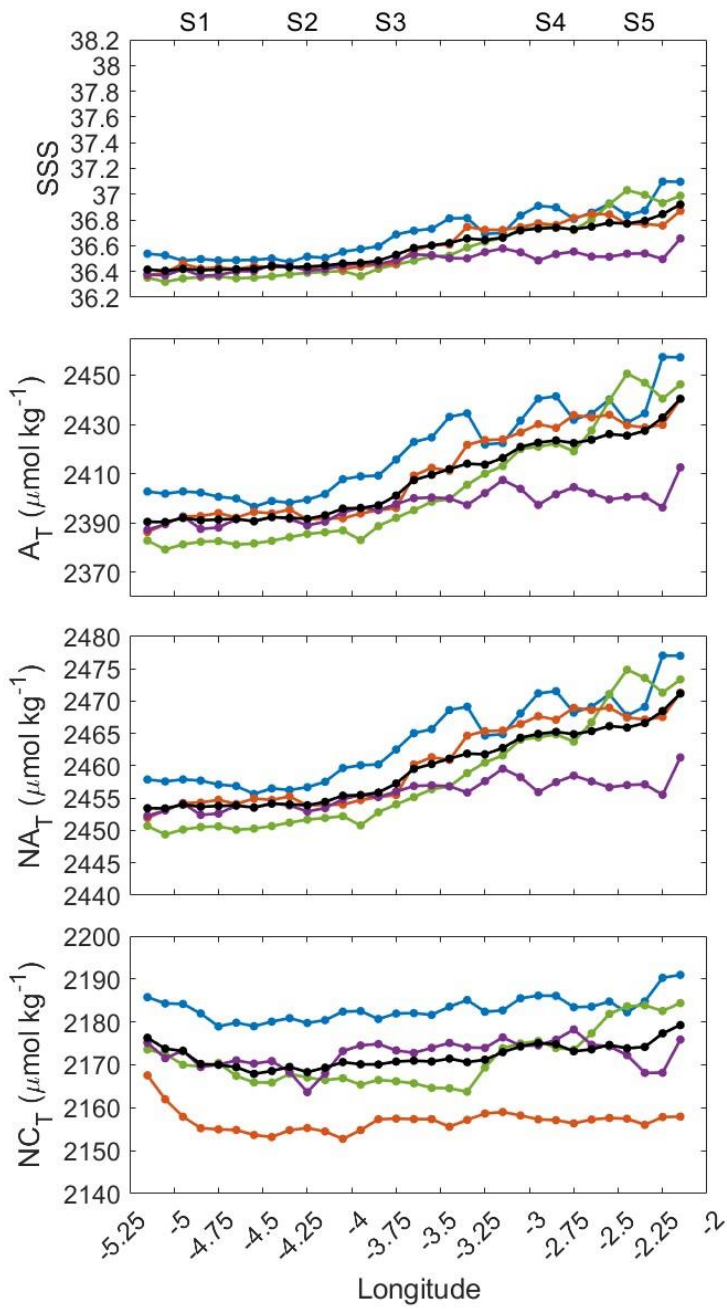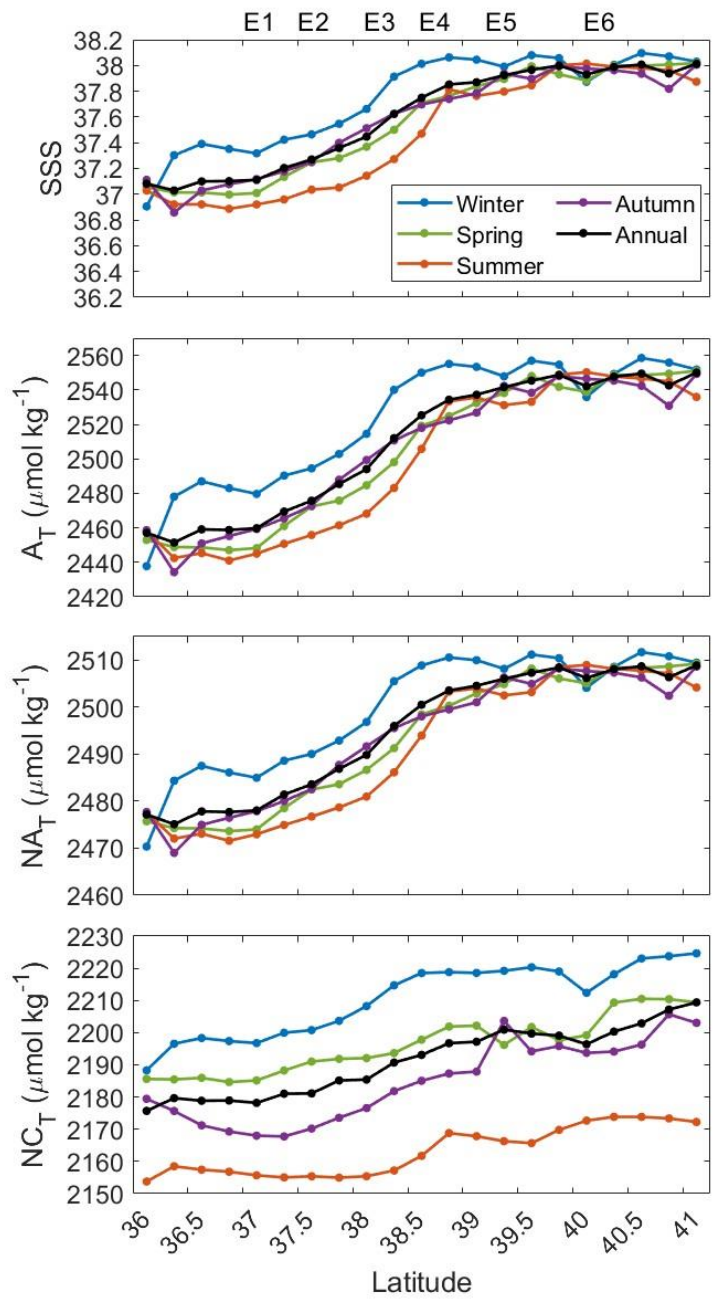

Fig. Sup2

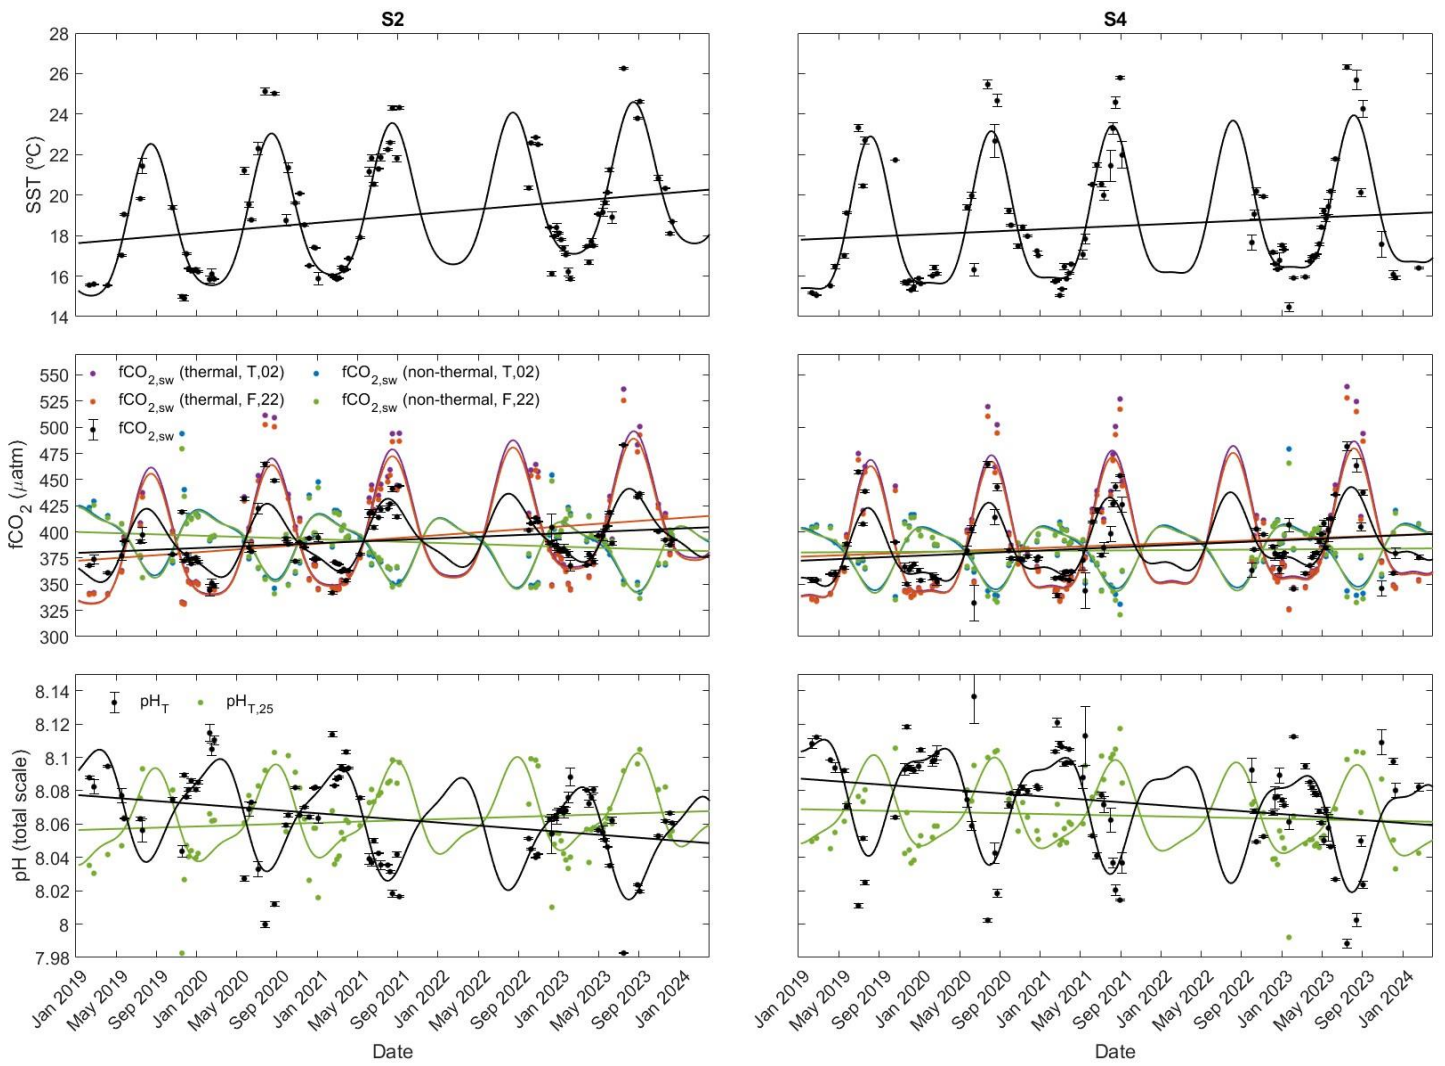

Fig. Sup3

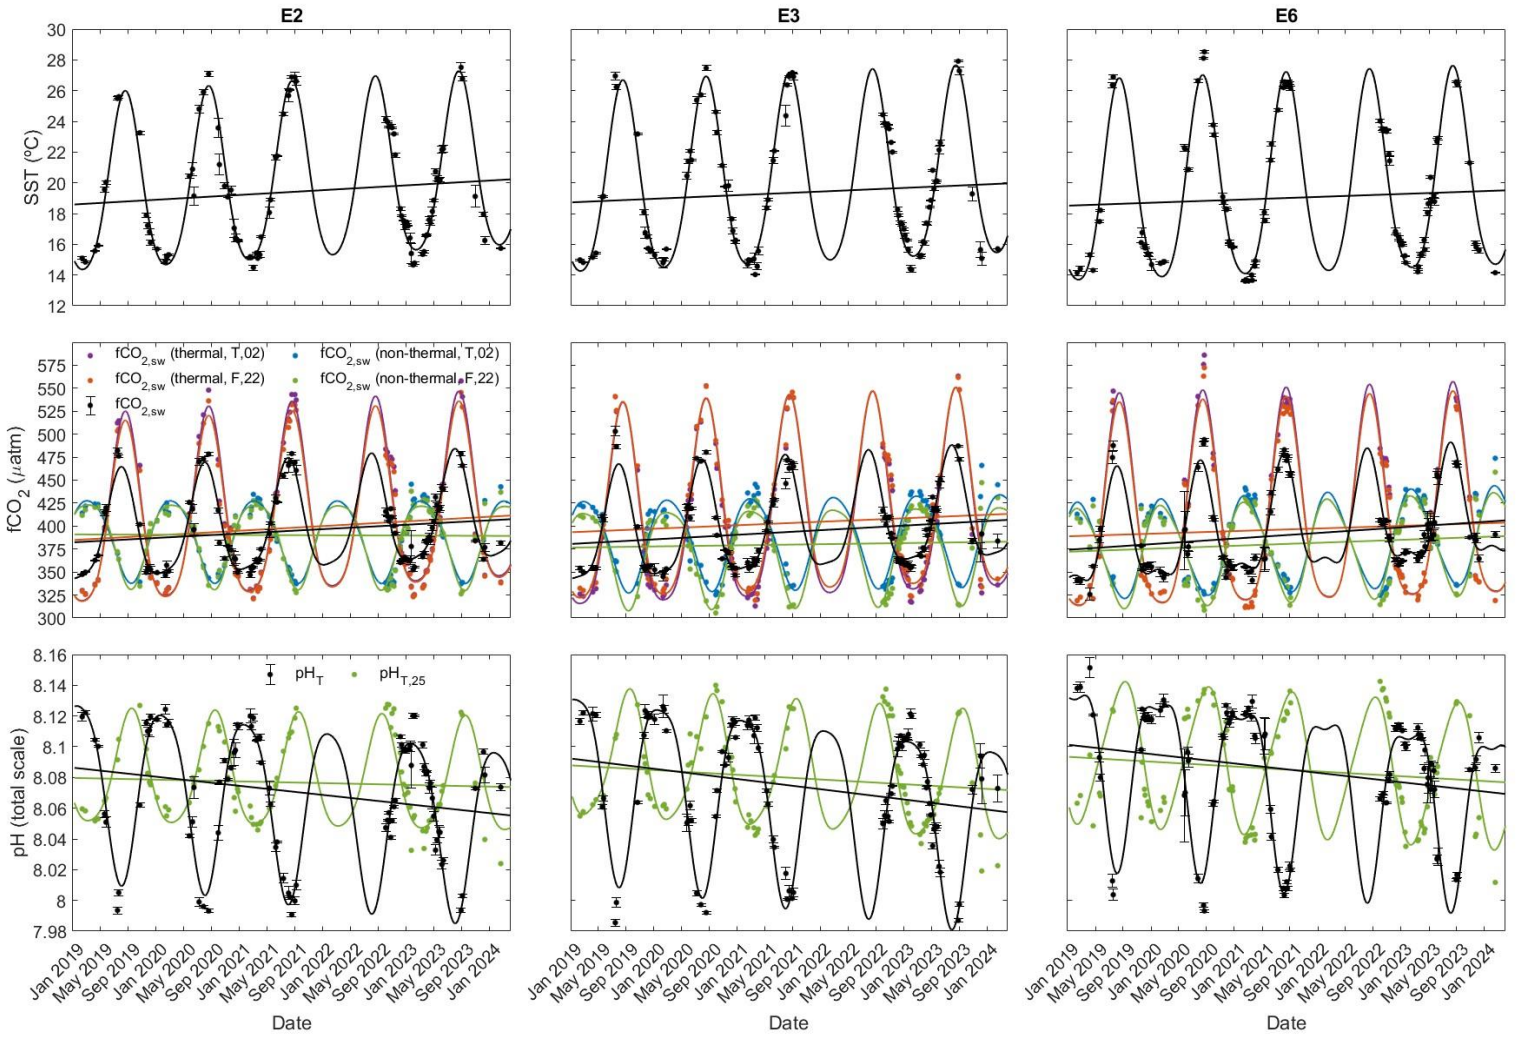

Fig. Sup4

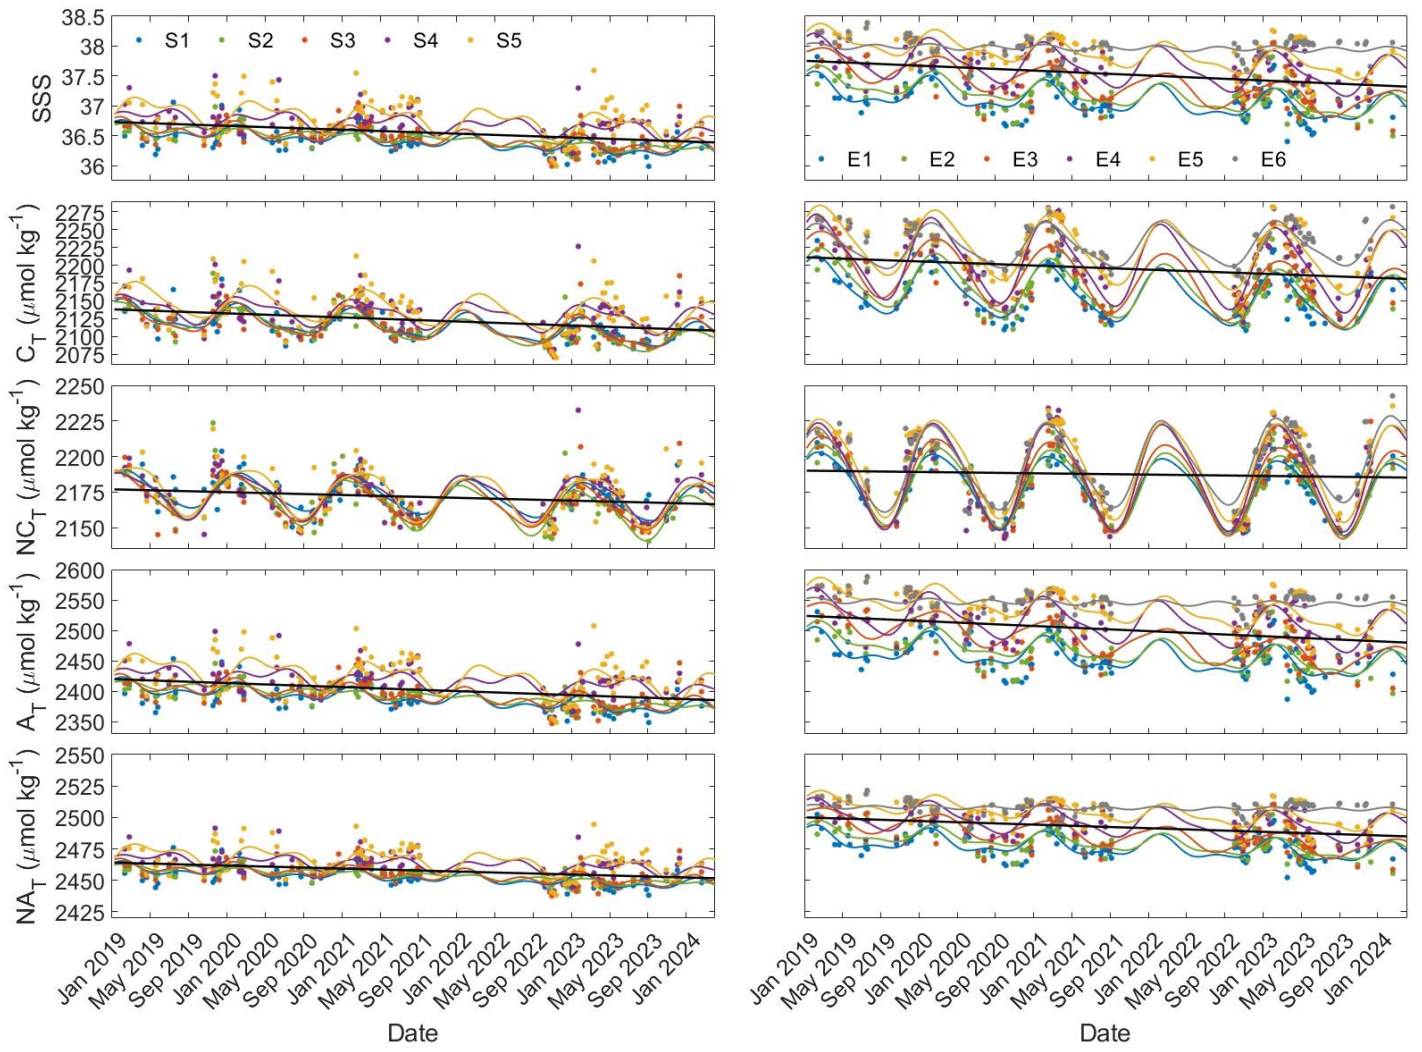

Fig. Sup5

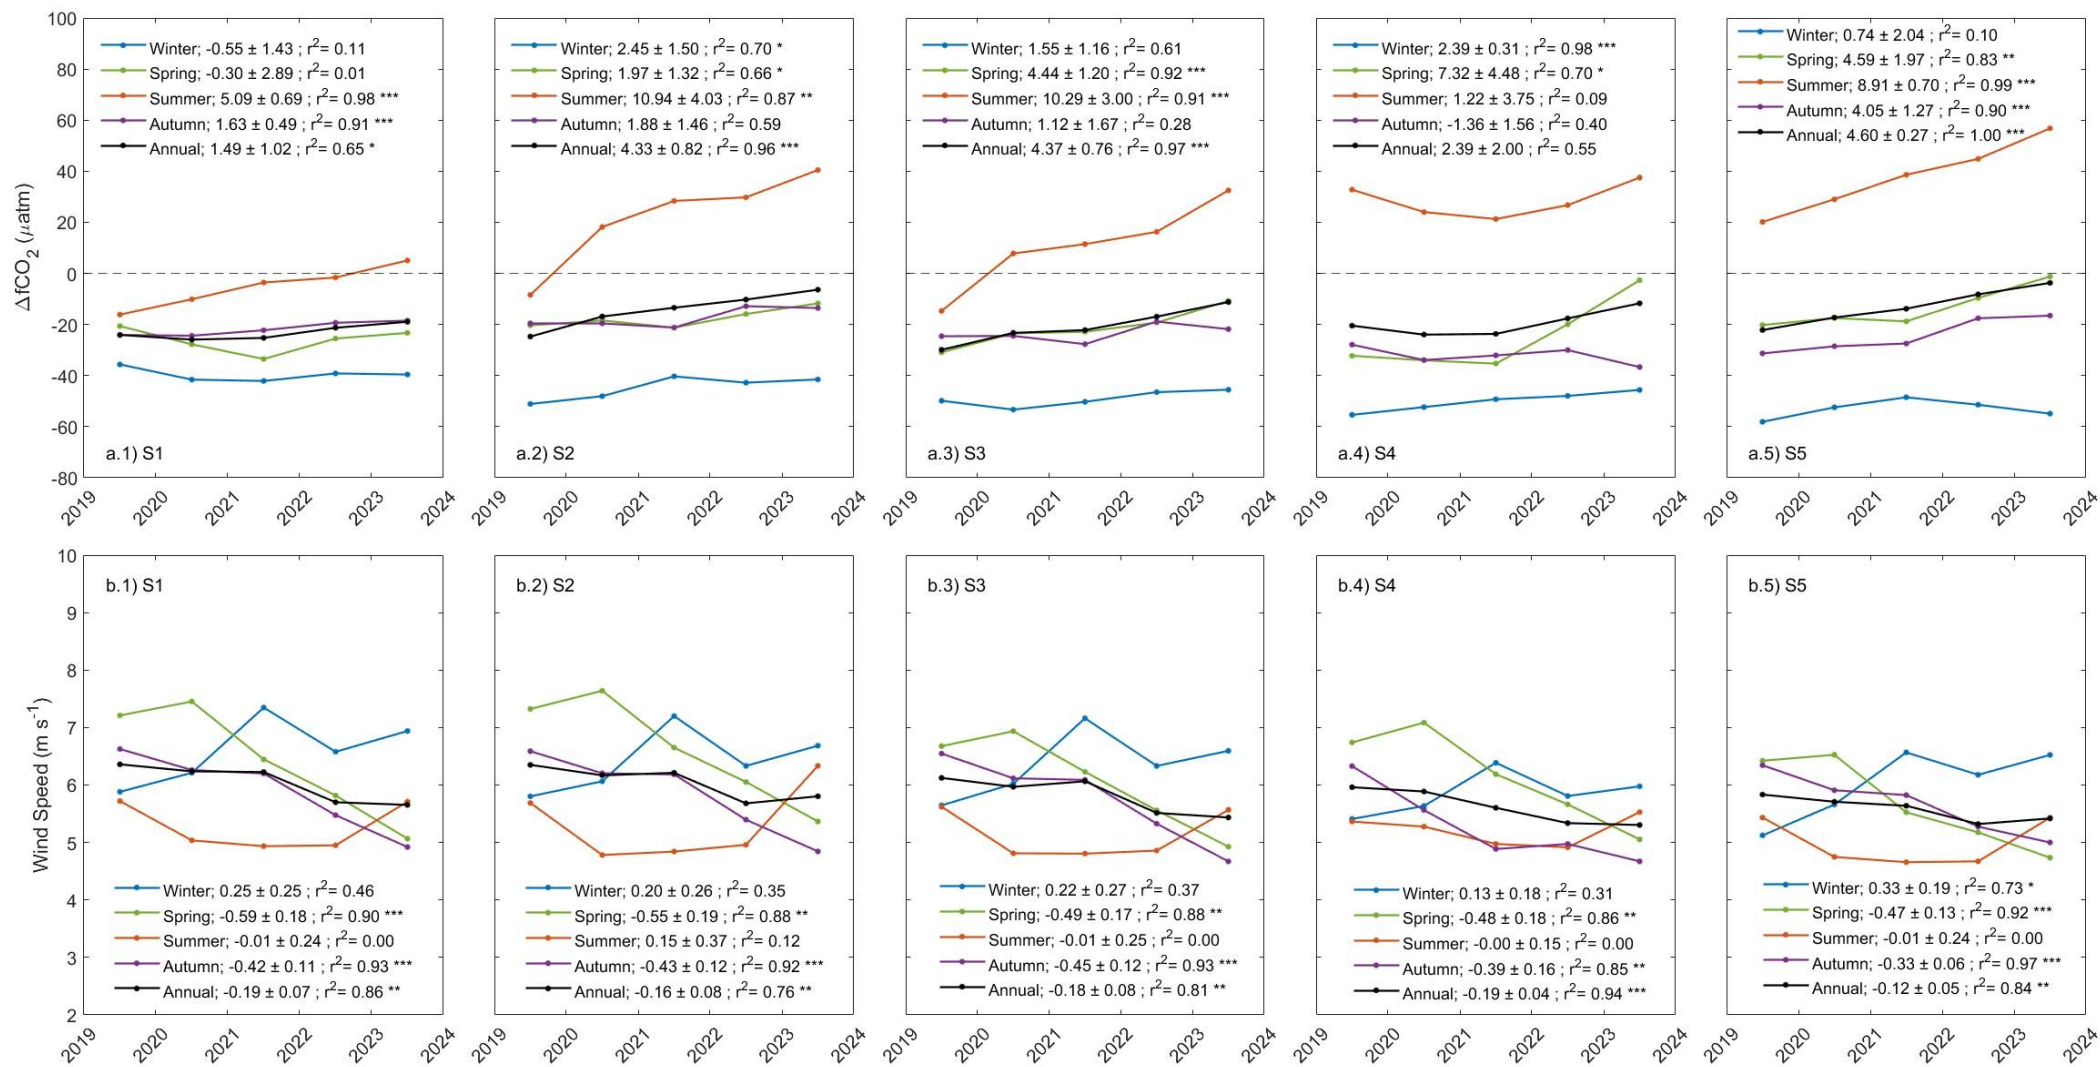



Fig. Sup6

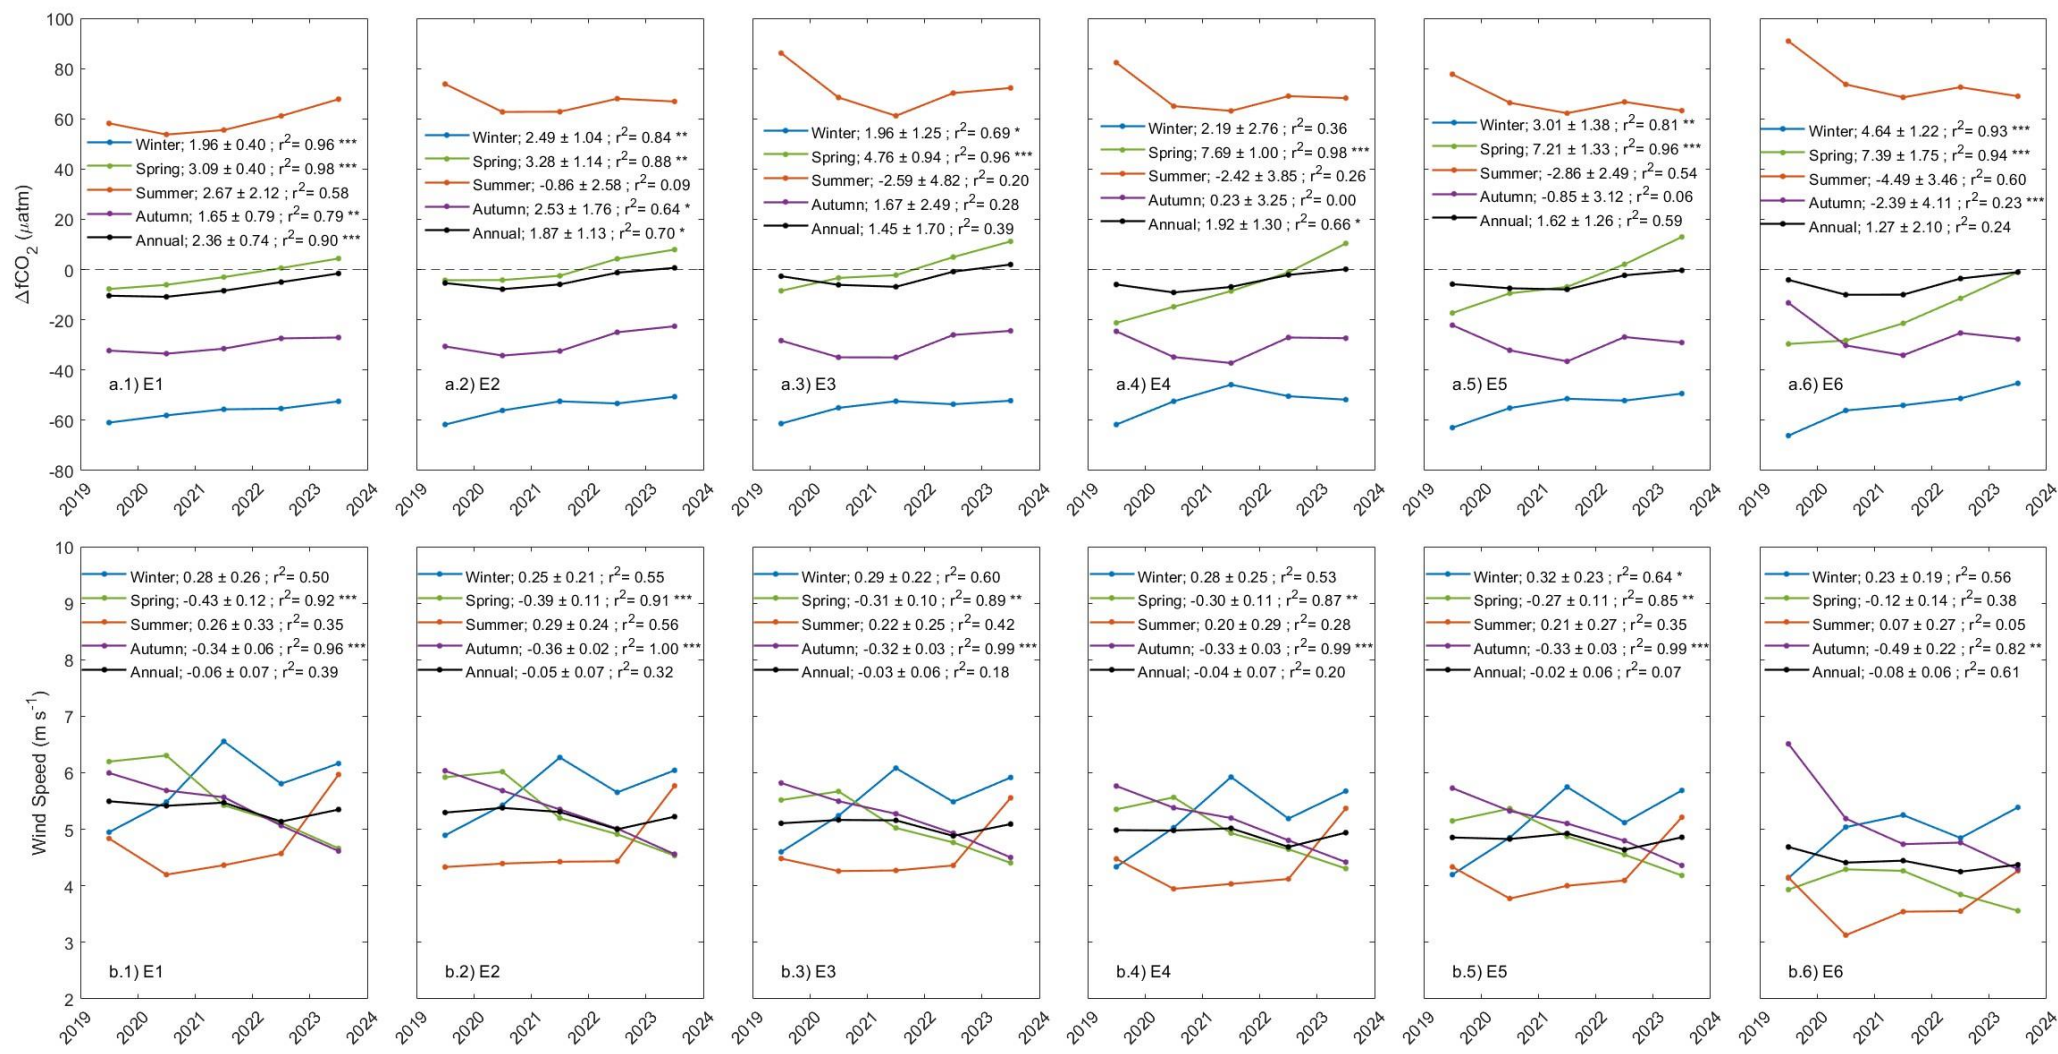

Table Sup1

| Coefficients                          |                            | S1             | S2             | S3             | S4             | S5             | E1             | E2             | E3             | E4             | E5             | E6             |
|---------------------------------------|----------------------------|----------------|----------------|----------------|----------------|----------------|----------------|----------------|----------------|----------------|----------------|----------------|
| SST (°C)                              | a                          | 17.35 ± 0.44   | 17.94 ± 0.52   | 17.77 ± 0.55   | 18.04 ± 0.59   | 18.07 ± 0.58   | 19.22 ± 0.50   | 19.30 ± 0.43   | 19.58 ± 0.44   | 19.40 ± 0.42   | 19.23 ± 0.39   | 19.23 ± 0.47   |
|                                       | b                          | 0.28 ± 0.14    | 0.52 ± 0.17    | 0.36 ± 0.18    | 0.26 ± 0.20    | 0.46 ± 0.19    | 0.29 ± 0.16    | 0.32 ± 0.14    | 0.24 ± 0.15    | 0.24 ± 0.14    | 0.23 ± 0.13    | 0.20 ± 0.16    |
|                                       | c                          | -1.19 ± 0.29   | -2.61 ± 0.33   | -2.42 ± 0.36   | -3.02 ± 0.40   | -3.45 ± 0.38   | -3.97 ± 0.33   | -4.05 ± 0.29   | -4.35 ± 0.30   | -4.64 ± 0.28   | -4.59 ± 0.26   | -4.69 ± 0.31   |
|                                       | d                          | -1.63 ± 0.32   | -2.51 ± 0.38   | -1.95 ± 0.40   | -2.11 ± 0.42   | -2.78 ± 0.38   | -3.74 ± 0.34   | -4.06 ± 0.29   | -4.35 ± 0.30   | -4.49 ± 0.29   | -4.46 ± 0.28   | -4.52 ± 0.32   |
|                                       | e                          | -0.10 ± 0.32   | 0.08 ± 0.36    | 0.18 ± 0.39    | 0.39 ± 0.43    | 0.50 ± 0.40    | -0.06 ± 0.34   | -0.06 ± 0.30   | -0.05 ± 0.32   | 0.07 ± 0.30    | 0.12 ± 0.28    | 0.12 ± 0.35    |
|                                       | f                          | 0.06 ± 0.29    | 0.65 ± 0.35    | 0.35 ± 0.36    | 0.94 ± 0.40    | 0.97 ± 0.37    | 0.90 ± 0.33    | 0.76 ± 0.28    | 0.81 ± 0.29    | 0.91 ± 0.28    | 0.92 ± 0.26    | 0.95 ± 0.30    |
|                                       | Standard error of estimate | 0.95           | 1.09           | 1.19           | 1.29           | 1.17           | 1.08           | 0.91           | 0.95           | 0.90           | 0.87           | 1.01           |
| $r^2$                                 | 0.69                       | 0.85           | 0.78           | 0.81           | 0.87           | 0.92           | 0.94           | 0.95           | 0.95           | 0.96           | 0.95           |                |
| SSS                                   | a                          | 36.610 ± 0.075 | 36.667 ± 0.062 | 36.651 ± 0.077 | 36.838 ± 0.105 | 36.947 ± 0.141 | 37.265 ± 0.107 | 37.429 ± 0.116 | 37.747 ± 0.141 | 37.840 ± 0.113 | 38.130 ± 0.105 | 38.001 ± 0.092 |
|                                       | b                          | -0.075 ± 0.025 | -0.080 ± 0.021 | -0.070 ± 0.025 | -0.052 ± 0.035 | -0.063 ± 0.046 | -0.070 ± 0.035 | -0.096 ± 0.038 | -0.142 ± 0.046 | -0.071 ± 0.038 | -0.101 ± 0.035 | -0.012 ± 0.031 |
|                                       | c                          | 0.079 ± 0.050  | 0.038 ± 0.039  | 0.069 ± 0.050  | -0.065 ± 0.071 | -0.110 ± 0.093 | 0.180 ± 0.071  | 0.109 ± 0.078  | 0.191 ± 0.097  | 0.196 ± 0.078  | 0.065 ± 0.071  | 0.014 ± 0.062  |
|                                       | d                          | 0.041 ± 0.055  | -0.016 ± 0.044 | 0.039 ± 0.056  | 0.077 ± 0.075  | 0.155 ± 0.094  | 0.116 ± 0.074  | 0.146 ± 0.078  | 0.166 ± 0.097  | 0.247 ± 0.080  | 0.181 ± 0.074  | -0.003 ± 0.063 |
|                                       | e                          | 0.025 ± 0.055  | -0.023 ± 0.042 | 0.060 ± 0.055  | 0.070 ± 0.077  | -0.034 ± 0.098 | 0.038 ± 0.074  | 0.004 ± 0.081  | -0.045 ± 0.101 | 0.088 ± 0.082  | 0.009 ± 0.075  | 0.014 ± 0.068  |
|                                       | f                          | 0.071 ± 0.050  | 0.035 ± 0.042  | 0.073 ± 0.051  | 0.061 ± 0.071  | 0.119 ± 0.090  | 0.099 ± 0.071  | 0.080 ± 0.075  | -0.016 ± 0.093 | 0.048 ± 0.076  | 0.084 ± 0.070  | 0.040 ± 0.060  |
|                                       | Standard error of estimate | 0.164          | 0.129          | 0.167          | 0.228          | 0.287          | 0.232          | 0.243          | 0.302          | 0.246          | 0.233          | 0.275          |
| $r^2$                                 | 0.43                       | 0.48           | 0.41           | 0.23           | 0.32           | 0.42           | 0.40           | 0.42           | 0.50           | 0.46           | 0.04           |                |
| $f\text{CO}_{2,\text{sw}}$            | a                          | 377.26 ± 4.65  | 381.71 ± 6.77  | 374.07 ± 8.11  | 374.33 ± 8.95  | 378.97 ± 6.19  | 388.42 ± 5.35  | 389.91 ± 5.12  | 389.31 ± 5.10  | 386.25 ± 5.86  | 386.69 ± 4.90  | 381.69 ± 6.16  |
|                                       | b                          | 3.16 ± 1.54    | 4.78 ± 2.27    | 5.16 ± 2.69    | 4.98 ± 2.98    | 6.27 ± 2.01    | 4.54 ± 1.74    | 4.92 ± 1.67    | 5.14 ± 1.67    | 5.64 ± 1.95    | 5.50 ± 1.62    | 6.46 ± 2.05    |
|                                       | c                          | -7.60 ± 3.09   | -22.13 ± 4.31  | -19.30 ± 5.30  | -27.65 ± 6.09  | -35.29 ± 4.07  | -50.91 ± 3.53  | -52.57 ± 3.44  | -54.14 ± 3.50  | -50.26 ± 4.02  | -51.17 ± 3.28  | -47.84 ± 4.12  |
|                                       | d                          | -10.65 ± 3.38  | -21.77 ± 4.87  | -16.89 ± 5.91  | -17.30 ± 6.38  | -25.62 ± 4.11  | -25.07 ± 3.71  | -25.96 ± 3.47  | -26.48 ± 3.51  | -26.89 ± 4.11  | -25.84 ± 3.46  | -32.58 ± 4.20  |
|                                       | e                          | 0.51 ± 3.39    | 7.23 ± 4.66    | 5.50 ± 5.82    | 9.35 ± 6.52    | 10.54 ± 4.29   | 5.75 ± 3.71    | 5.76 ± 3.59    | 7.77 ± 3.66    | 8.32 ± 4.25    | 11.12 ± 3.51   | 9.31 ± 4.55    |
|                                       | f                          | 0.28 ± 3.11    | 4.64 ± 4.58    | 2.15 ± 5.39    | 9.70 ± 6.02    | 6.39 ± 3.95    | 10.95 ± 3.54   | 12.10 ± 3.32   | 13.10 ± 3.35   | 16.59 ± 3.92   | 13.41 ± 3.25   | 20.05 ± 3.99   |
|                                       | Standard error of estimate | 10.13          | 14.13          | 17.68          | 19.46          | 12.59          | 11.59          | 10.77          | 10.92          | 12.72          | 10.86          | 15.09          |
| $r^2$                                 | 0.50                       | 0.72           | 0.55           | 0.63           | 0.86           | 0.92           | 0.93           | 0.93           | 0.90           | 0.93           | 0.91           |                |
| $f\text{CO}_{2,\text{T}} \text{T}02$  | a                          | 378.00 ± 7.52  | 379.96 ± 9.42  | 378.07 ± 9.86  | 382.79 ± 10.85 | 384.42 ± 10.18 | 397.76 ± 8.82  | 400.82 ± 7.75  | 403.68 ± 7.54  | 405.76 ± 7.08  | 407.72 ± 6.55  | 405.04 ± 8.06  |
|                                       | b                          | 4.58 ± 2.48    | 8.68 ± 3.15    | 6.09 ± 3.27    | 4.43 ± 3.62    | 7.92 ± 3.30    | 5.23 ± 2.87    | 5.44 ± 2.53    | 3.97 ± 2.48    | 3.92 ± 2.35    | 3.77 ± 2.16    | 3.06 ± 2.68    |
|                                       | c                          | -19.88 ± 5.00  | -44.93 ± 6.00  | -41.19 ± 6.45  | -51.68 ± 7.38  | -60.20 ± 6.70  | -69.50 ± 5.82  | -71.33 ± 5.20  | -76.23 ± 5.17  | -81.87 ± 4.86  | -81.20 ± 4.39  | -82.30 ± 5.38  |
|                                       | d                          | -27.40 ± 5.47  | -43.74 ± 6.77  | -33.44 ± 7.19  | -36.69 ± 7.74  | -49.52 ± 6.75  | -66.74 ± 6.11  | -72.48 ± 5.25  | -77.21 ± 5.19  | -79.82 ± 4.97  | -79.55 ± 4.62  | -79.97 ± 5.50  |
|                                       | e                          | -1.99 ± 5.48   | 1.28 ± 6.48    | 3.45 ± 7.08    | 7.38 ± 7.91    | 8.16 ± 7.05    | -1.01 ± 6.12   | -1.44 ± 5.43   | -1.19 ± 5.41   | 1.34 ± 5.13    | 1.91 ± 4.69    | 2.02 ± 5.95    |
|                                       | f                          | 1.82 ± 5.03    | 13.49 ± 6.36   | 7.98 ± 6.55    | 18.75 ± 7.30   | 20.73 ± 6.49   | 21.06 ± 5.83   | 19.17 ± 5.02   | 20.21 ± 4.95   | 22.89 ± 4.74   | 22.51 ± 4.34   | 23.38 ± 5.22   |
|                                       | Standard error of estimate | 16.39          | 19.66          | 21.50          | 23.60          | 20.70          | 19.09          | 16.29          | 16.15          | 15.37          | 14.52          | 17.30          |
| $r^2$                                 | 0.68                       | 0.84           | 0.76           | 0.80           | 0.88           | 0.92           | 0.94           | 0.95           | 0.96           | 0.96           | 0.95           |                |
| $f\text{CO}_{2,\text{NT}} \text{T}02$ | a                          | 385.61 ± 6.73  | 397.48 ± 8.35  | 383.76 ± 6.95  | 378.10 ± 6.50  | 390.25 ± 8.83  | 388.67 ± 5.04  | 387.23 ± 4.63  | 381.28 ± 6.51  | 378.71 ± 7.09  | 377.18 ± 6.92  | 371.22 ± 8.41  |
|                                       | b                          | -1.54 ± 2.22   | -3.92 ± 2.80   | -0.80 ± 2.30   | 0.83 ± 2.17    | -1.33 ± 2.86   | -0.18 ± 1.64   | -0.07 ± 1.51   | 1.47 ± 2.14    | 1.65 ± 2.36    | 2.00 ± 2.29    | 3.57 ± 2.79    |
|                                       | c                          | 11.76 ± 4.48   | 21.88 ± 5.32   | 21.04 ± 4.54   | 22.46 ± 4.42   | 22.26 ± 5.81   | 16.30 ± 3.33   | 16.04 ± 3.11   | 19.85 ± 4.46   | 28.01 ± 4.86   | 26.13 ± 4.64   | 30.77 ± 5.62   |
|                                       | d                          | 15.78 ± 4.89   | 19.00 ± 6.01   | 14.87 ± 5.07   | 17.34 ± 4.64   | 19.61 ± 5.85   | 37.43 ± 3.50   | 41.73 ± 3.13   | 45.62 ± 4.48   | 47.43 ± 4.97   | 47.30 ± 4.89   | 42.07 ± 5.74   |
|                                       | e                          | 2.26 ± 4.91    | 5.61 ± 5.75    | 2.43 ± 4.98    | 2.96 ± 4.74    | 2.03 ± 6.11    | 4.83 ± 3.50    | 4.75 ± 3.24    | 5.79 ± 4.68    | 4.77 ± 5.14    | 6.85 ± 4.96    | 5.48 ± 6.21    |
|                                       | f                          | -0.66 ± 4.51   | -6.96 ± 5.65   | -3.93 ± 4.61   | -6.17 ± 4.38   | -10.38 ± 5.62  | -4.79 ± 3.33   | -1.67 ± 3.00   | -1.66 ± 4.28   | 0.26 ± 4.74    | -2.67 ± 4.60   | 2.91 ± 5.45    |
|                                       | Standard error of estimate | 14.67          | 17.44          | 15.14          | 14.14          | 17.94          | 10.92          | 9.73           | 13.95          | 15.39          | 15.35          | 19.24          |
| $r^2$                                 | 0.46                       | 0.60           | 0.59           | 0.67           | 0.58           | 0.86           | 0.90           | 0.85           | 0.84           | 0.84           | 0.78           |                |
| a                                     | 378.01 ± 7.27              | 377.71 ± 8.96  | 375.01 ± 9.36  | 380.51 ± 10.31 | 378.78 ± 9.64  | 393.09 ± 8.37  | 397.38 ± 7.38  | 408.62 ± 7.37  | 405.80 ± 6.86  | 404.95 ± 6.34  | 401.83 ± 7.74  |                |

|                                              |                            |                  |                  |                  |                  |                  |                  |                  |                  |                  |                  |                  |
|----------------------------------------------|----------------------------|------------------|------------------|------------------|------------------|------------------|------------------|------------------|------------------|------------------|------------------|------------------|
| $f\text{CO}_{2\text{T}}$ F'22                | b                          | 4.47 ± 2.40      | 8.36 ± 3.00      | 5.86 ± 3.11      | 4.26 ± 3.44      | 7.55 ± 3.13      | 4.95 ± 2.72      | 5.22 ± 2.41      | 3.91 ± 2.42      | 3.84 ± 2.28      | 3.68 ± 2.09      | 3.01 ± 2.57      |
|                                              | c                          | -19.34 ± 4.84    | -43.14 ± 5.70    | -39.54 ± 6.12    | -49.68 ± 7.01    | -57.25 ± 6.34    | -66.21 ± 5.52    | -68.16 ± 4.95    | -74.39 ± 5.05    | -79.02 ± 4.71    | -77.93 ± 4.25    | -78.96 ± 5.17    |
|                                              | d                          | -26.63 ± 5.28    | -41.89 ± 6.44    | -32.07 ± 6.83    | -35.19 ± 7.35    | -46.91 ± 6.39    | -63.39 ± 5.80    | -69.11 ± 4.99    | -75.19 ± 5.08    | -76.93 ± 4.82    | -76.25 ± 4.48    | -76.61 ± 5.28    |
|                                              | e                          | -1.88 ± 5.30     | 1.25 ± 6.16      | 3.26 ± 6.72      | 6.99 ± 7.51      | 7.85 ± 6.67      | -0.96 ± 5.81     | -1.32 ± 5.16     | -1.12 ± 5.29     | 1.26 ± 4.97      | 1.85 ± 4.54      | 1.94 ± 5.72      |
|                                              | f                          | 1.63 ± 4.87      | 12.58 ± 6.05     | 7.33 ± 6.22      | 17.61 ± 6.94     | 19.10 ± 6.14     | 19.21 ± 5.53     | 17.40 ± 4.78     | 18.71 ± 4.84     | 21.00 ± 4.59     | 20.60 ± 4.21     | 21.37 ± 5.02     |
|                                              | Standard error of estimate | 15.85            | 18.69            | 20.41            | 22.41            | 19.60            | 18.12            | 15.51            | 15.79            | 14.90            | 14.06            | 16.61            |
|                                              | $r^2$                      | 0.68             | 0.84             | 0.76             | 0.80             | 0.88             | 0.92             | 0.94             | 0.95             | 0.96             | 0.96             | 0.95             |
| $f\text{CO}_{2\text{NT}}$ F'22               | a                          | 383.92 ± 6.75    | 396.44 ± 7.62    | 384.72 ± 6.57    | 377.94 ± 6.29    | 392.47 ± 8.24    | 389.70 ± 5.00    | 385.97 ± 4.57    | 370.06 ± 6.12    | 370.23 ± 7.17    | 372.48 ± 6.65    | 366.59 ± 8.12    |
|                                              | b                          | -1.36 ± 2.23     | -3.58 ± 2.55     | -0.68 ± 2.18     | 0.75 ± 2.10      | -1.27 ± 2.68     | -0.54 ± 1.63     | -0.33 ± 1.49     | 1.25 ± 2.01      | 1.74 ± 2.38      | 1.78 ± 2.20      | 3.44 ± 2.70      |
|                                              | c                          | 11.71 ± 4.49     | 21.05 ± 4.85     | 20.47 ± 4.29     | 22.22 ± 4.28     | 21.92 ± 5.42     | 15.51 ± 3.30     | 15.54 ± 3.07     | 20.45 ± 4.19     | 28.88 ± 4.92     | 26.85 ± 4.46     | 31.12 ± 5.43     |
|                                              | d                          | 16.11 ± 4.90     | 20.10 ± 5.48     | 15.27 ± 4.79     | 18.26 ± 4.49     | 21.31 ± 5.47     | 38.55 ± 3.47     | 43.16 ± 3.09     | 48.74 ± 4.21     | 50.19 ± 5.03     | 50.49 ± 4.70     | 44.08 ± 5.54     |
|                                              | e                          | 2.48 ± 4.92      | 5.97 ± 5.24      | 2.27 ± 4.71      | 2.65 ± 4.58      | 2.70 ± 5.71      | 6.73 ± 3.47      | 7.16 ± 3.20      | 8.70 ± 4.39      | 7.08 ± 5.19      | 9.15 ± 4.76      | 7.42 ± 6.00      |
|                                              | f                          | -1.31 ± 4.51     | -7.91 ± 5.15     | -5.15 ± 4.36     | -8.05 ± 4.23     | -12.71 ± 5.25    | -7.90 ± 3.30     | -5.24 ± 2.96     | -5.68 ± 4.02     | -4.47 ± 4.80     | -7.25 ± 4.41     | -1.30 ± 5.27     |
|                                              | Standard error of estimate | 14.70            | 15.90            | 14.31            | 13.68            | 16.76            | 10.83            | 9.61             | 13.10            | 15.56            | 14.74            | 18.90            |
| $r^2$                                        | 0.46                       | 0.64             | 0.61             | 0.70             | 0.64             | 0.87             | 0.91             | 0.88             | 0.85             | 0.87             | 0.81             |                  |
| pH (total scale)                             | a                          | 8.0792 ± 0.0048  | 8.0758 ± 0.0061  | 8.0831 ± 0.0078  | 8.0855 ± 0.0085  | 8.0826 ± 0.0060  | 8.0786 ± 0.0054  | 8.0794 ± 0.0052  | 8.0840 ± 0.0047  | 8.0877 ± 0.0054  | 8.0911 ± 0.0044  | 8.0946 ± 0.0053  |
|                                              | b                          | -0.0041 ± 0.0016 | -0.0056 ± 0.0020 | -0.0059 ± 0.0026 | -0.0054 ± 0.0028 | -0.0068 ± 0.0019 | -0.0054 ± 0.0018 | -0.0061 ± 0.0017 | -0.0068 ± 0.0016 | -0.0063 ± 0.0018 | -0.0066 ± 0.0015 | -0.0065 ± 0.0017 |
|                                              | c                          | 0.0085 ± 0.0032  | 0.0214 ± 0.0039  | 0.0193 ± 0.0051  | 0.0254 ± 0.0058  | 0.0319 ± 0.0039  | 0.0497 ± 0.0036  | 0.0502 ± 0.0035  | 0.0525 ± 0.0033  | 0.0495 ± 0.0037  | 0.0486 ± 0.0029  | 0.0451 ± 0.0035  |
|                                              | d                          | 0.0111 ± 0.0035  | 0.0207 ± 0.0044  | 0.0170 ± 0.0057  | 0.0178 ± 0.0061  | 0.0268 ± 0.0040  | 0.0256 ± 0.0038  | 0.0267 ± 0.0035  | 0.0276 ± 0.0033  | 0.0292 ± 0.0038  | 0.0277 ± 0.0031  | 0.0314 ± 0.0036  |
|                                              | e                          | -0.0003 ± 0.0035 | -0.0069 ± 0.0042 | -0.0042 ± 0.0056 | -0.0075 ± 0.0062 | -0.0104 ± 0.0041 | -0.0037 ± 0.0038 | -0.0041 ± 0.0036 | -0.0062 ± 0.0034 | -0.0054 ± 0.0039 | -0.0091 ± 0.0031 | -0.0075 ± 0.0039 |
|                                              | f                          | 0.0008 ± 0.0032  | -0.0034 ± 0.0041 | -0.0006 ± 0.0052 | -0.0079 ± 0.0057 | -0.0037 ± 0.0038 | -0.0075 ± 0.0036 | -0.0089 ± 0.0034 | -0.0109 ± 0.0031 | -0.0133 ± 0.0036 | -0.0103 ± 0.0029 | -0.0166 ± 0.0034 |
|                                              | Standard error of estimate | 0.0105           | 0.0127           | 0.0170           | 0.0186           | 0.0121           | 0.0117           | 0.0109           | 0.0102           | 0.0117           | 0.0097           | 0.0128           |
| $r^2$                                        | 0.54                       | 0.76             | 0.58             | 0.63             | 0.86             | 0.92             | 0.92             | 0.94             | 0.91             | 0.94             | 0.92             |                  |
| pH <sub>19</sub> (total scale)               | a                          | 8.0539 ± 0.0064  | 8.0596 ± 0.0070  | 8.0644 ± 0.0063  | 8.0710 ± 0.0056  | 8.0682 ± 0.0075  | 8.0810 ± 0.0047  | 8.0835 ± 0.0045  | 8.0926 ± 0.0055  | 8.0932 ± 0.0064  | 8.0942 ± 0.0061  | 8.0976 ± 0.0071  |
|                                              | b                          | 0.0002 ± 0.0021  | 0.0022 ± 0.0023  | -0.0004 ± 0.0021 | -0.0015 ± 0.0019 | 0.0003 ± 0.0024  | -0.0008 ± 0.0015 | -0.0012 ± 0.0015 | -0.0032 ± 0.0018 | -0.0025 ± 0.0021 | -0.0030 ± 0.0020 | -0.0034 ± 0.0024 |
|                                              | c                          | -0.0097 ± 0.0043 | -0.0183 ± 0.0045 | -0.0177 ± 0.0041 | -0.0207 ± 0.0038 | -0.0206 ± 0.0049 | -0.0108 ± 0.0031 | -0.0113 ± 0.0030 | -0.0138 ± 0.0038 | -0.0213 ± 0.0044 | -0.0213 ± 0.0041 | -0.0264 ± 0.0048 |
|                                              | d                          | -0.0139 ± 0.0047 | -0.0173 ± 0.0050 | -0.0128 ± 0.0046 | -0.0146 ± 0.0040 | -0.0155 ± 0.0050 | -0.0315 ± 0.0033 | -0.0350 ± 0.0030 | -0.0386 ± 0.0038 | -0.0392 ± 0.0045 | -0.0403 ± 0.0043 | -0.0375 ± 0.0049 |
|                                              | e                          | -0.0019 ± 0.0047 | -0.0056 ± 0.0048 | -0.0015 ± 0.0046 | -0.0019 ± 0.0041 | -0.0028 ± 0.0052 | -0.0047 ± 0.0033 | -0.0051 ± 0.0031 | -0.0068 ± 0.0039 | -0.0044 ± 0.0047 | -0.0073 ± 0.0044 | -0.0057 ± 0.0053 |
|                                              | f                          | 0.0017 ± 0.0043  | 0.0064 ± 0.0047  | 0.0046 ± 0.0042  | 0.0064 ± 0.0037  | 0.0108 ± 0.0048  | 0.0055 ± 0.0031  | 0.0024 ± 0.0029  | 0.0011 ± 0.0036  | 0.0002 ± 0.0043  | 0.0034 ± 0.0040  | -0.0025 ± 0.0046 |
|                                              | Standard error of estimate | 0.0140           | 0.0146           | 0.0138           | 0.0121           | 0.0152           | 0.0103           | 0.0095           | 0.0118           | 0.0140           | 0.0135           | 0.0164           |
| $r^2$                                        | 0.40                       | 0.61             | 0.55             | 0.70             | 0.61             | 0.82             | 0.87             | 0.85             | 0.81             | 0.83             | 0.80             |                  |
| $\text{C}_\text{T}$ (μmol kg <sup>-1</sup> ) | a                          | 2131.5 ± 6.4     | 2132.9 ± 7.0     | 2129.1 ± 7.1     | 2141.4 ± 9.8     | 2152.6 ± 12.9    | 2172.2 ± 8.8     | 2184.5 ± 9.2     | 2207.4 ± 12.4    | 2213.7 ± 10.4    | 2237.7 ± 9.8     | 2224.6 ± 10.1    |
|                                              | b                          | -6.5 ± 2.1       | -8.1 ± 2.3       | -5.8 ± 2.3       | -3.6 ± 3.3       | -5.7 ± 4.2       | -5.6 ± 2.9       | -7.6 ± 3.0       | -10.5 ± 4.1      | -4.6 ± 3.5       | -6.8 ± 3.2       | 1.0 ± 3.4        |
|                                              | c                          | 12.3 ± 4.3       | 13.6 ± 4.5       | 16.2 ± 4.6       | 6.5 ± 6.7        | 2.5 ± 8.5        | 21.8 ± 5.8       | 16.3 ± 6.2       | 23.3 ± 8.5       | 30.3 ± 7.2       | 19.0 ± 6.6       | 17.3 ± 6.8       |
|                                              | d                          | 11.5 ± 4.7       | 8.5 ± 5.0        | 10.7 ± 5.1       | 15.3 ± 7.0       | 22.6 ± 8.6       | 28.9 ± 6.1       | 33.8 ± 6.2       | 37.6 ± 8.6       | 45.8 ± 7.3       | 40.9 ± 6.9       | 23.9 ± 6.9       |
|                                              | e                          | 3.0 ± 4.7        | 1.2 ± 4.8        | 6.0 ± 5.1        | 7.1 ± 7.2        | -1.5 ± 8.9       | 6.1 ± 6.1        | 3.5 ± 6.4        | 1.9 ± 8.9        | 10.3 ± 7.6       | 5.3 ± 7.0        | 5.2 ± 7.5        |
|                                              | f                          | 5.1 ± 4.3        | -1.0 ± 4.7       | 3.6 ± 4.7        | 1.3 ± 6.6        | 3.7 ± 8.2        | 5.1 ± 5.8        | 5.4 ± 5.9        | -1.7 ± 8.2       | 3.9 ± 7.0        | 5.0 ± 6.5        | 4.5 ± 6.6        |
|                                              | Standard error of estimate | 14.0             | 14.6             | 15.4             | 21.4             | 26.2             | 19.1             | 19.3             | 26.6             | 22.7             | 21.8             | 27.4             |
| $r^2$                                        | 0.56                       | 0.55             | 0.55             | 0.28             | 0.33             | 0.65             | 0.68             | 0.60             | 0.73             | 0.68             | 0.45             |                  |
| NC <sub>T</sub> (μmol kg <sup>-1</sup> )     | a                          | 2177.5 ± 3.7     | 2175.7 ± 4.6     | 2172.6 ± 4.0     | 2174.0 ± 4.6     | 2178.8 ± 6.0     | 2180.0 ± 3.5     | 2182.8 ± 3.2     | 2186.1 ± 5.0     | 2187.6 ± 5.0     | 2194.7 ± 4.7     | 2189.2 ± 5.7     |
|                                              | b                          | -2.3 ± 1.2       | -3.6 ± 1.6       | -1.8 ± 1.3       | -0.6 ± 1.5       | -2.1 ± 1.9       | -1.5 ± 1.1       | -2.0 ± 1.0       | -2.0 ± 1.6       | -0.4 ± 1.7       | -0.9 ± 1.5       | 1.7 ± 1.9        |
|                                              | c                          | 7.9 ± 2.5        | 11.8 ± 3.0       | 12.4 ± 2.6       | 10.4 ± 3.1       | 9.0 ± 3.9        | 11.5 ± 2.3       | 9.9 ± 2.2        | 13.2 ± 3.4       | 18.5 ± 3.4       | 14.9 ± 3.1       | 16.6 ± 3.8       |
|                                              | d                          | 9.4 ± 2.7        | 9.8 ± 3.3        | 8.7 ± 2.9        | 11.0 ± 3.3       | 13.9 ± 4.0       | 22.3 ± 2.4       | 25.4 ± 2.2       | 28.1 ± 3.4       | 31.0 ± 3.5       | 29.9 ± 3.3       | 23.5 ± 3.9       |
|                                              | e                          | 1.7 ± 2.7        | 2.7 ± 3.2        | 2.6 ± 2.9        | 3.0 ± 3.3        | 0.7 ± 4.1        | 4.0 ± 2.4        | 3.4 ± 2.2        | 3.6 ± 3.6        | 5.2 ± 3.6        | 4.8 ± 3.4        | 4.2 ± 4.2        |
|                                              | f                          | 1.0 ± 2.5        | -2.9 ± 3.1       | -0.6 ± 2.7       | -2.2 ± 3.1       | -3.2 ± 3.8       | -0.6 ± 2.3       | 0.7 ± 2.1        | -1.1 ± 3.3       | 1.0 ± 3.3        | 0.0 ± 3.1        | 2.2 ± 3.7        |

|                                                |                            |                   |                   |                   |                   |                   |                   |                   |                   |                   |                   |                   |     |  |  |
|------------------------------------------------|----------------------------|-------------------|-------------------|-------------------|-------------------|-------------------|-------------------|-------------------|-------------------|-------------------|-------------------|-------------------|-----|--|--|
|                                                | Standard error of estimate | 8.2               | 9.7               | 8.8               | 9.9               | 12.2              | 7.5               | 6.7               | 10.7              | 10.8              | 10.4              | 13.7              |     |  |  |
|                                                | $r^2$                      | 0.55              | 0.61              | 0.61              | 0.54              | 0.48              | 0.83              | 0.88              | 0.79              | 0.83              | 0.82              | 0.71              |     |  |  |
| $A_T$ ( $\mu\text{mol kg}^{-1}$ )              | a                          | 2407.7 $\pm$ 7.5  | 2413.4 $\pm$ 6.2  | 2412.0 $\pm$ 7.7  | 2430.9 $\pm$ 10.7 | 2442.1 $\pm$ 14.3 | 2474.3 $\pm$ 10.8 | 2490.9 $\pm$ 11.7 | 2523.1 $\pm$ 14.3 | 2532.6 $\pm$ 11.5 | 2561.9 $\pm$ 10.7 | 2549.3            | 9.0 |  |  |
|                                                | b                          | -7.4 $\pm$ 2.5    | -8.1 $\pm$ 2.1    | -7.1 $\pm$ 2.6    | -5.3 $\pm$ 3.6    | -6.4 $\pm$ 4.6    | -7.1 $\pm$ 3.5    | -9.7 $\pm$ 3.8    | -14.4 $\pm$ 4.7   | -7.2 $\pm$ 3.8    | -10.2 $\pm$ 3.5   | -1.3              | 3.0 |  |  |
|                                                | c                          | 8.0 $\pm$ 5.0     | 3.8 $\pm$ 4.0     | 7.0 $\pm$ 5.1     | -6.6 $\pm$ 7.2    | -11.1 $\pm$ 9.4   | 18.2 $\pm$ 7.2    | 11.0 $\pm$ 7.9    | 19.3 $\pm$ 9.8    | 19.9 $\pm$ 7.9    | 6.6 $\pm$ 7.1     | 1.1               | 6.0 |  |  |
|                                                | d                          | 4.2 $\pm$ 5.5     | -1.7 $\pm$ 4.5    | 3.9 $\pm$ 5.6     | 7.8 $\pm$ 7.6     | 15.6 $\pm$ 9.5    | 11.7 $\pm$ 7.5    | 14.8 $\pm$ 7.9    | 16.8 $\pm$ 9.8    | 25.1 $\pm$ 8.1    | 18.4 $\pm$ 7.5    | -0.1              | 6.2 |  |  |
|                                                | e                          | 2.4 $\pm$ 5.5     | -2.4 $\pm$ 4.3    | 6.0 $\pm$ 5.5     | 7.1 $\pm$ 7.8     | -3.5 $\pm$ 9.9    | 3.8 $\pm$ 7.5     | 0.5 $\pm$ 8.2     | -4.6 $\pm$ 10.3   | 8.9 $\pm$ 8.3     | 0.9 $\pm$ 7.6     | 1.5               | 6.7 |  |  |
|                                                | f                          | 7.1 $\pm$ 5.0     | 3.4 $\pm$ 4.2     | 7.3 $\pm$ 5.1     | 6.2 $\pm$ 7.2     | 11.9 $\pm$ 9.1    | 10.1 $\pm$ 7.2    | 8.2 $\pm$ 7.6     | -1.7 $\pm$ 9.4    | 4.9 $\pm$ 7.7     | 8.6 $\pm$ 7.1     | 3.8               | 5.9 |  |  |
|                                                | Standard error of estimate | 16.4              | 13.0              | 16.8              | 23.2              | 29.0              | 23.5              | 24.6              | 30.6              | 25.0              | 23.6              | 27.4              |     |  |  |
|                                                | $r^2$                      | 0.4               | 0.5               | 0.4               | 0.2               | 0.3               | 0.4               | 0.4               | 0.4               | 0.5               | 0.5               | 0.0               |     |  |  |
| $NA_T$ ( $\mu\text{mol kg}^{-1}$ )             | a                          | 2459.7 $\pm$ 2.7  | 2461.8 $\pm$ 2.2  | 2461.3 $\pm$ 2.8  | 2467.9 $\pm$ 3.8  | 2471.9 $\pm$ 5.1  | 2483.1 $\pm$ 3.8  | 2488.9 $\pm$ 4.1  | 2499.8 $\pm$ 4.9  | 2503.0 $\pm$ 3.9  | 2512.9 $\pm$ 3.6  | 2508.6 $\pm$ 3.0  |     |  |  |
|                                                | b                          | -2.7 $\pm$ 0.9    | -2.9 $\pm$ 0.8    | -2.6 $\pm$ 0.9    | -1.9 $\pm$ 1.3    | -2.3 $\pm$ 1.6    | -2.5 $\pm$ 1.2    | -3.4 $\pm$ 1.3    | -5.0 $\pm$ 1.6    | -2.4 $\pm$ 1.3    | -3.4 $\pm$ 1.2    | -0.4 $\pm$ 1.0    |     |  |  |
|                                                | c                          | 2.9 $\pm$ 1.8     | 1.4 $\pm$ 1.4     | 2.5 $\pm$ 1.8     | -2.4 $\pm$ 2.6    | -4.0 $\pm$ 3.3    | 6.3 $\pm$ 2.5     | 3.8 $\pm$ 2.7     | 6.6 $\pm$ 3.4     | 6.7 $\pm$ 2.7     | 2.2 $\pm$ 2.4     | 0.4 $\pm$ 2.0     |     |  |  |
|                                                | d                          | 1.5 $\pm$ 2.0     | -0.6 $\pm$ 1.6    | 1.4 $\pm$ 2.0     | 2.8 $\pm$ 2.7     | 5.5 $\pm$ 3.4     | 4.0 $\pm$ 2.6     | 5.1 $\pm$ 2.7     | 5.8 $\pm$ 3.4     | 8.5 $\pm$ 2.7     | 6.2 $\pm$ 2.5     | 0.0 $\pm$ 2.1     |     |  |  |
|                                                | e                          | 0.9 $\pm$ 2.0     | -0.9 $\pm$ 1.5    | 2.2 $\pm$ 2.0     | 2.5 $\pm$ 2.8     | -1.2 $\pm$ 3.5    | 1.3 $\pm$ 2.6     | 0.2 $\pm$ 2.8     | -1.6 $\pm$ 3.5    | 3.0 $\pm$ 2.8     | 0.3 $\pm$ 2.6     | 0.5 $\pm$ 2.2     |     |  |  |
|                                                | f                          | 2.6 $\pm$ 1.8     | 1.2 $\pm$ 1.5     | 2.7 $\pm$ 1.8     | 2.2 $\pm$ 2.5     | 4.2 $\pm$ 3.2     | 3.5 $\pm$ 2.5     | 2.8 $\pm$ 2.6     | -0.6 $\pm$ 3.2    | 1.6 $\pm$ 2.6     | 2.9 $\pm$ 2.4     | 1.3 $\pm$ 2.0     |     |  |  |
|                                                | Standard error of estimate | 5.9               | 4.7               | 6.1               | 8.2               | 10.3              | 8.2               | 8.5               | 10.5              | 8.5               | 8.0               | 9.2               |     |  |  |
|                                                | $r^2$                      | 0.4               | 0.5               | 0.4               | 0.2               | 0.3               | 0.4               | 0.4               | 0.4               | 0.5               | 0.5               | 0.0               |     |  |  |
| $FCO_2$ ( $\text{mmol m}^{-2} \text{d}^{-1}$ ) | a                          | -2.55 $\pm$ 0.94  | -2.37 $\pm$ 1.11  | -2.55 $\pm$ 1.13  | -2.98 $\pm$ 1.15  | -2.30 $\pm$ 0.99  | -1.93 $\pm$ 0.97  | -1.69 $\pm$ 0.93  | -1.52 $\pm$ 0.91  | -1.65 $\pm$ 0.85  | -1.47 $\pm$ 0.79  | -1.85 $\pm$ 0.84  |     |  |  |
|                                                | b                          | 0.19 $\pm$ 0.31   | 0.32 $\pm$ 0.37   | 0.23 $\pm$ 0.38   | 0.44 $\pm$ 0.38   | 0.34 $\pm$ 0.32   | 0.31 $\pm$ 0.32   | 0.30 $\pm$ 0.30   | 0.26 $\pm$ 0.30   | 0.30 $\pm$ 0.28   | 0.25 $\pm$ 0.26   | 0.35 $\pm$ 0.28   |     |  |  |
|                                                | c                          | -1.36 $\pm$ 0.63  | -1.90 $\pm$ 0.71  | -1.98 $\pm$ 0.74  | -2.12 $\pm$ 0.78  | -2.82 $\pm$ 0.65  | -3.44 $\pm$ 0.64  | -3.34 $\pm$ 0.62  | -3.26 $\pm$ 0.62  | -2.74 $\pm$ 0.58  | -2.65 $\pm$ 0.53  | -2.35 $\pm$ 0.56  |     |  |  |
|                                                | d                          | -1.49 $\pm$ 0.68  | -2.31 $\pm$ 0.80  | -1.90 $\pm$ 0.83  | -1.79 $\pm$ 0.82  | -2.00 $\pm$ 0.66  | -1.94 $\pm$ 0.67  | -1.86 $\pm$ 0.63  | -1.80 $\pm$ 0.63  | -1.58 $\pm$ 0.59  | -1.51 $\pm$ 0.56  | -1.36 $\pm$ 0.57  |     |  |  |
|                                                | e                          | 0.01 $\pm$ 0.69   | 0.63 $\pm$ 0.76   | 0.37 $\pm$ 0.81   | 0.89 $\pm$ 0.84   | 0.45 $\pm$ 0.69   | 0.28 $\pm$ 0.67   | 0.16 $\pm$ 0.65   | 0.19 $\pm$ 0.65   | 0.23 $\pm$ 0.61   | 0.37 $\pm$ 0.56   | 0.00 $\pm$ 0.62   |     |  |  |
|                                                | f                          | -0.32 $\pm$ 0.63  | -0.04 $\pm$ 0.75  | -0.37 $\pm$ 0.75  | 0.28 $\pm$ 0.78   | 0.01 $\pm$ 0.63   | 0.26 $\pm$ 0.64   | 0.44 $\pm$ 0.60   | 0.50 $\pm$ 0.60   | 0.68 $\pm$ 0.57   | 0.53 $\pm$ 0.52   | 0.84 $\pm$ 0.54   |     |  |  |
|                                                | Standard error of estimate | 2.05              | 2.31              | 2.47              | 2.51              | 2.01              | 2.10              | 1.95              | 1.95              | 1.84              | 1.75              | 1.85              |     |  |  |
|                                                | $r^2$                      | 0.33              | 0.46              | 0.39              | 0.42              | 0.58              | 0.63              | 0.63              | 0.61              | 0.57              | 0.58              | 0.54              |     |  |  |
| $d_fCO_2$                                      | a                          | -25.24 $\pm$ 4.67 | -20.49 $\pm$ 6.97 | -28.39 $\pm$ 8.10 | -27.57 $\pm$ 9.06 | -22.63 $\pm$ 6.21 | -12.44 $\pm$ 5.22 | -10.89 $\pm$ 5.11 | -11.40 $\pm$ 5.19 | -15.11 $\pm$ 5.92 | -14.39 $\pm$ 5.04 | -18.35 $\pm$ 6.49 |     |  |  |
|                                                | b                          | 1.13 $\pm$ 1.54   | 2.92 $\pm$ 2.33   | 3.27 $\pm$ 2.69   | 2.84 $\pm$ 3.02   | 4.12 $\pm$ 2.02   | 2.11 $\pm$ 1.70   | 2.75 $\pm$ 1.67   | 3.01 $\pm$ 1.70   | 3.70 $\pm$ 1.97   | 3.45 $\pm$ 1.67   | 4.21 $\pm$ 2.16   |     |  |  |
|                                                | c                          | -12.70 $\pm$ 3.11 | -27.96 $\pm$ 4.44 | -25.04 $\pm$ 5.29 | -33.93 $\pm$ 6.16 | -41.71 $\pm$ 4.09 | -57.56 $\pm$ 3.45 | -59.99 $\pm$ 3.43 | -61.70 $\pm$ 3.55 | -58.00 $\pm$ 4.06 | -58.93 $\pm$ 3.38 | -55.15 $\pm$ 4.34 |     |  |  |
|                                                | d                          | -16.46 $\pm$ 3.40 | -27.87 $\pm$ 5.01 | -22.92 $\pm$ 5.90 | -23.43 $\pm$ 6.46 | -32.03 $\pm$ 4.12 | -32.63 $\pm$ 3.62 | -33.73 $\pm$ 3.46 | -33.88 $\pm$ 3.57 | -33.94 $\pm$ 4.15 | -32.58 $\pm$ 3.56 | -40.32 $\pm$ 4.43 |     |  |  |
|                                                | e                          | -1.57 $\pm$ 3.41  | 5.20 $\pm$ 4.79   | 3.84 $\pm$ 5.81   | 7.22 $\pm$ 6.60   | 8.98 $\pm$ 4.30   | 4.16 $\pm$ 3.62   | 4.37 $\pm$ 3.58   | 6.52 $\pm$ 3.72   | 7.28 $\pm$ 4.29   | 10.38 $\pm$ 3.61  | 8.45 $\pm$ 4.79   |     |  |  |
|                                                | f                          | 1.82 $\pm$ 3.13   | 6.38 $\pm$ 4.71   | 3.46 $\pm$ 5.38   | 11.35 $\pm$ 6.10  | 8.30 $\pm$ 3.96   | 12.76 $\pm$ 3.45  | 13.96 $\pm$ 3.31  | 14.81 $\pm$ 3.41  | 18.50 $\pm$ 3.96  | 15.39 $\pm$ 3.35  | 22.97 $\pm$ 4.21  |     |  |  |
|                                                | Standard error of estimate | 10.18             | 14.55             | 17.65             | 19.69             | 12.63             | 11.31             | 10.73             | 11.10             | 12.86             | 11.18             | 16.18             |     |  |  |
|                                                | $r^2$                      | 0.66              | 0.78              | 0.65              | 0.71              | 0.89              | 0.94              | 0.95              | 0.95              | 0.92              | 0.94              | 0.92              |     |  |  |

Table Sup2

|           | SST (°C)       |        |        |        | SSS    |        |        |        | fCO <sub>2,aq</sub> (µatm) |        |        |        | pH (total scale) |        |        |        | pH <sub>tp</sub> (total scale) |        |        |        | C <sub>t</sub> (µmol kg <sup>-1</sup> ) |        |        |        | NC <sub>t</sub> (µmol kg <sup>-1</sup> ) |        |        |        | A <sub>t</sub> (µmol kg <sup>-1</sup> ) |        |        |        | NA <sub>t</sub> (µmol kg <sup>-1</sup> ) |        |        |        |      |      |      |      |      |      |     |      |      |      |
|-----------|----------------|--------|--------|--------|--------|--------|--------|--------|----------------------------|--------|--------|--------|------------------|--------|--------|--------|--------------------------------|--------|--------|--------|-----------------------------------------|--------|--------|--------|------------------------------------------|--------|--------|--------|-----------------------------------------|--------|--------|--------|------------------------------------------|--------|--------|--------|------|------|------|------|------|------|-----|------|------|------|
|           | Longitude (°W) | Winter | Spring | Summer | Autumn | Annual | Winter | Spring | Summer                     | Autumn | Annual | Winter | Spring           | Summer | Autumn | Annual | Winter                         | Spring | Summer | Autumn | Annual                                  | Winter | Spring | Summer | Autumn                                   | Annual | Winter | Spring | Summer                                  | Autumn | Annual | Winter | Spring                                   | Summer | Autumn | Annual |      |      |      |      |      |      |     |      |      |      |
| S section | 5.15           | 0.69   | 1.04   | 2.13   | 1.12   | 1.70   | 0.255  | 0.197  | 0.223                      | 0.253  | 0.247  | 10.84  | 11.63            | 13.47  | 12.68  | 14.02  | 0.0121                         | 0.0124 | 0.0137 | 0.0134 | 0.0151                                  | 0.0130 | 0.0166 | 0.0246 | 0.0186                                   | 0.0197 | 20.6   | 16.6   | 19.6                                    | 24.5   | 23.3   | 10.2   | 9.5                                      | 14.2   | 14.1   | 13.7   | 20.6 | 19.1 | 19.9 | 23.4 | 22.3 | 7.4  | 6.9 | 7.2  | 8.5  | 8.1  |
|           | 5.05           | 0.68   | 1.02   | 2.12   | 1.31   | 1.83   | 0.232  | 0.173  | 0.241                      | 0.261  | 0.243  | 12.41  | 11.73            | 17.09  | 11.65  | 15.16  | 0.0144                         | 0.0124 | 0.0165 | 0.0136 | 0.0164                                  | 0.0133 | 0.0144 | 0.0155 | 0.0200                                   | 0.0192 | 17.9   | 14.5   | 19.0                                    | 23.2   | 22.0   | 8.5    | 8.3                                      | 9.9    | 13.7   | 12.8   | 20.1 | 16.8 | 21.1 | 21.8 | 21.7 | 7.3  | 6.1 | 7.6  | 7.9  | 7.8  |
|           | 4.95           | 0.72   | 1.23   | 2.20   | 1.68   | 2.00   | 0.323  | 0.167  | 0.198                      | 0.303  | 0.271  | 12.96  | 13.84            | 27.13  | 13.05  | 18.66  | 0.0149                         | 0.0139 | 0.0260 | 0.0154 | 0.0195                                  | 0.0123 | 0.0168 | 0.0163 | 0.0211                                   | 0.0207 | 19.8   | 15.3   | 15.2                                    | 28.8   | 24.4   | 9.1    | 9.9                                      | 8.6    | 16.1   | 14.3   | 22.2 | 16.8 | 20.1 | 27.5 | 23.6 | 8.0  | 6.1 | 7.2  | 9.8  | 8.5  |
|           | 4.85           | 0.67   | 1.27   | 2.46   | 1.69   | 2.46   | 0.345  | 0.151  | 0.225                      | 0.252  | 0.261  | 13.08  | 15.57            | 29.38  | 11.53  | 23.55  | 0.0147                         | 0.0155 | 0.0281 | 0.0133 | 0.0235                                  | 0.0131 | 0.0162 | 0.0168 | 0.0237                                   | 0.0224 | 22.5   | 11.9   | 12.3                                    | 24.4   | 22.2   | 10.5   | 8.2                                      | 8.4    | 16.1   | 14.4   | 24.4 | 15.0 | 17.4 | 21.9 | 21.5 | 8.8  | 5.4 | 6.3  | 7.9  | 7.8  |
|           | 4.75           | 0.78   | 1.51   | 2.21   | 2.05   | 2.57   | 0.338  | 0.149  | 0.234                      | 0.205  | 0.251  | 14.60  | 13.42            | 26.77  | 11.96  | 25.03  | 0.0167                         | 0.0135 | 0.0255 | 0.0133 | 0.0249                                  | 0.0140 | 0.0146 | 0.0121 | 0.0271                                   | 0.0224 | 23.0   | 13.6   | 15.1                                    | 23.3   | 21.9   | 11.0   | 8.4                                      | 7.9    | 18.0   | 14.6   | 25.0 | 15.2 | 17.7 | 16.7 | 20.6 | 9.1  | 5.5 | 6.3  | 6.1  | 7.5  |
|           | 4.65           | 0.73   | 1.60   | 1.92   | 1.93   | 2.64   | 0.306  | 0.133  | 0.179                      | 0.225  | 0.235  | 13.43  | 13.90            | 20.14  | 12.55  | 24.95  | 0.0147                         | 0.0128 | 0.0176 | 0.0138 | 0.0241                                  | 0.0127 | 0.0157 | 0.0130 | 0.0269                                   | 0.0229 | 21.2   | 12.7   | 8.1                                     | 24.2   | 21.3   | 10.4   | 9.0                                      | 7.0    | 18.0   | 14.9   | 22.2 | 13.5 | 9.7  | 17.6 | 18.4 | 8.0  | 4.9 | 3.5  | 6.4  | 6.7  |
|           | 4.55           | 0.78   | 1.50   | 1.91   | 1.85   | 2.65   | 0.249  | 0.117  | 0.176                      | 0.233  | 0.209  | 13.74  | 15.61            | 21.24  | 12.53  | 25.43  | 0.0153                         | 0.0145 | 0.0185 | 0.0142 | 0.0245                                  | 0.0127 | 0.0122 | 0.0117 | 0.0258                                   | 0.0226 | 20.8   | 9.6    | 8.0                                     | 23.6   | 20.0   | 9.8    | 6.3                                      | 6.6    | 17.1   | 14.1   | 23.2 | 11.9 | 8.7  | 19.7 | 18.3 | 8.4  | 4.3 | 3.1  | 7.1  | 6.6  |
|           | 4.45           | 0.77   | 1.62   | 1.91   | 2.10   | 2.77   | 0.265  | 0.128  | 0.175                      | 0.209  | 0.212  | 13.71  | 18.37            | 22.49  | 14.27  | 26.40  | 0.0154                         | 0.0178 | 0.0195 | 0.0147 | 0.0254                                  | 0.0141 | 0.0102 | 0.0111 | 0.0286                                   | 0.0240 | 19.4   | 11.5   | 8.1                                     | 29.0   | 22.5   | 9.8    | 6.3                                      | 6.5    | 20.3   | 15.9   | 21.2 | 13.0 | 8.0  | 20.3 | 18.3 | 7.7  | 4.7 | 2.9  | 7.3  | 6.6  |
|           | 4.35           | 0.77   | 1.57   | 2.05   | 2.10   | 2.63   | 0.282  | 0.138  | 0.190                      | 0.209  | 0.218  | 13.97  | 19.53            | 24.86  | 13.35  | 25.78  | 0.0161                         | 0.0195 | 0.0217 | 0.0142 | 0.0249                                  | 0.0146 | 0.0082 | 0.0102 | 0.0258                                   | 0.0224 | 16.5   | 12.8   | 6.5                                     | 28.1   | 21.1   | 8.8    | 5.9                                      | 5.7    | 18.8   | 14.6   | 19.4 | 14.0 | 6.7  | 20.2 | 17.8 | 7.0  | 5.1 | 2.4  | 7.3  | 6.4  |
|           | 4.25           | 0.80   | 1.50   | 2.63   | 2.07   | 2.58   | 0.230  | 0.140  | 0.166                      | 0.194  | 0.197  | 12.13  | 17.98            | 31.35  | 12.98  | 25.05  | 0.0141                         | 0.0183 | 0.0275 | 0.0143 | 0.0245                                  | 0.0122 | 0.0080 | 0.0145 | 0.0221                                   | 0.0198 | 18.0   | 13.6   | 7.4                                     | 23.0   | 20.2   | 8.5    | 6.4                                      | 7.5    | 15.5   | 13.3   | 20.6 | 14.2 | 8.6  | 17.6 | 17.7 | 7.4  | 5.1 | 3.1  | 6.4  | 6.4  |
|           | 4.15           | 0.70   | 1.60   | 2.66   | 2.03   | 2.65   | 0.303  | 0.138  | 0.092                      | 0.226  | 0.228  | 10.33  | 18.45            | 30.55  | 14.18  | 26.17  | 0.0124                         | 0.0186 | 0.0267 | 0.0162 | 0.0255                                  | 0.0118 | 0.0095 | 0.0156 | 0.0220                                   | 0.0202 | 19.1   | 12.9   | 6.6                                     | 24.7   | 21.1   | 8.9    | 6.4                                      | 7.8    | 15.7   | 13.7   | 21.8 | 14.0 | 9.3  | 20.7 | 19.2 | 7.9  | 5.1 | 3.4  | 7.5  | 6.9  |
|           | 4.05           | 0.63   | 1.55   | 2.32   | 1.77   | 2.67   | 0.382  | 0.146  | 0.161                      | 0.251  | 0.272  | 13.70  | 17.45            | 29.39  | 12.54  | 26.62  | 0.0173                         | 0.0179 | 0.0258 | 0.0150 | 0.0265                                  | 0.0148 | 0.0127 | 0.0146 | 0.0191                                   | 0.0217 | 22.4   | 13.4   | 9.1                                     | 25.9   | 23.8   | 9.3    | 7.6                                      | 8.4    | 15.0   | 14.8   | 30.2 | 14.8 | 7.8  | 23.2 | 23.4 | 10.8 | 5.3 | 2.8  | 8.4  | 8.4  |
|           | 3.95           | 0.69   | 1.53   | 2.21   | 1.55   | 2.54   | 0.324  | 0.139  | 0.189                      | 0.265  | 0.258  | 13.74  | 22.37            | 30.13  | 11.66  | 26.39  | 0.0150                         | 0.0226 | 0.0276 | 0.0139 | 0.0260                                  | 0.0158 | 0.0166 | 0.0116 | 0.0182                                   | 0.0218 | 21.2   | 10.5   | 10.3                                    | 27.6   | 23.4   | 10.9   | 8.2                                      | 6.6    | 15.5   | 15.0   | 24.5 | 14.1 | 12.6 | 24.1 | 22.2 | 8.8  | 5.1 | 4.5  | 8.7  | 8.0  |
|           | 3.85           | 0.70   | 1.67   | 2.11   | 1.70   | 2.37   | 0.279  | 0.195  | 0.211                      | 0.253  | 0.247  | 12.09  | 23.74            | 26.21  | 11.85  | 24.37  | 0.0127                         | 0.0227 | 0.0250 | 0.0141 | 0.0242                                  | 0.0134 | 0.0130 | 0.0125 | 0.0173                                   | 0.0190 | 22.1   | 15.4   | 13.6                                    | 25.9   | 23.0   | 10.9   | 7.1                                      | 7.7    | 14.4   | 13.6   | 21.9 | 19.8 | 16.2 | 23.1 | 22.0 | 7.9  | 7.2 | 5.8  | 8.3  | 7.9  |
|           | 3.75           | 0.71   | 1.59   | 1.77   | 1.69   | 2.29   | 0.258  | 0.196  | 0.236                      | 0.292  | 0.269  | 11.64  | 27.32            | 26.57  | 15.80  | 25.04  | 0.0139                         | 0.0271 | 0.0248 | 0.0180 | 0.0256                                  | 0.0113 | 0.0118 | 0.0121 | 0.0188                                   | 0.0184 | 23.5   | 16.6   | 15.1                                    | 29.1   | 25.7   | 9.9    | 7.3                                      | 7.3    | 15.7   | 14.0   | 26.2 | 19.9 | 19.2 | 27.9 | 25.8 | 9.4  | 7.2 | 6.9  | 10.0 | 9.3  |
|           | 3.65           | 0.75   | 1.60   | 2.17   | 1.73   | 2.49   | 0.345  | 0.218  | 0.294                      | 0.281  | 0.306  | 13.81  | 28.28            | 34.05  | 17.14  | 28.89  | 0.0163                         | 0.0292 | 0.0307 | 0.0186 | 0.0290                                  | 0.0131 | 0.0145 | 0.0114 | 0.0202                                   | 0.0201 | 22.3   | 17.8   | 14.4                                    | 26.7   | 24.7   | 9.3    | 8.7                                      | 4.7    | 15.2   | 13.7   | 28.5 | 22.0 | 22.0 | 28.3 | 28.2 | 10.2 | 7.9 | 7.9  | 10.2 | 10.1 |
|           | 3.55           | 0.73   | 1.57   | 2.40   | 1.75   | 2.56   | 0.405  | 0.226  | 0.308                      | 0.291  | 0.333  | 11.14  | 26.91            | 36.21  | 17.66  | 29.48  | 0.0148                         | 0.0275 | 0.0326 | 0.0189 | 0.0293                                  | 0.0100 | 0.0165 | 0.0155 | 0.0190                                   | 0.0205 | 27.6   | 18.8   | 17.1                                    | 27.9   | 26.9   | 9.9    | 10.4                                     | 7.5    | 15.4   | 14.4   | 34.7 | 22.9 | 25.0 | 28.8 | 30.9 | 12.4 | 8.3 | 8.9  | 10.3 | 11.0 |
|           | 3.45           | 0.68   | 1.62   | 1.17   | 1.61   | 2.51   | 0.419  | 0.200  | 0.253                      | 0.306  | 0.343  | 9.66   | 25.03            | 34.51  | 15.49  | 27.95  | 0.0130                         | 0.0249 | 0.0315 | 0.0171 | 0.0280                                  | 0.0096 | 0.0159 | 0.0125 | 0.0173                                   | 0.0201 | 30.3   | 16.1   | 14.5                                    | 31.0   | 29.4   | 11.6   | 9.4                                      | 6.4    | 16.2   | 15.5   | 36.1 | 19.4 | 20.6 | 29.0 | 31.8 | 12.8 | 7.0 | 7.4  | 10.4 | 11.3 |
|           | 3.35           | 0.65   | 1.82   | 2.36   | 1.76   | 2.87   | 0.423  | 0.197  | 0.210                      | 0.309  | 0.333  | 10.56  | 31.41            | 32.23  | 15.01  | 31.43  | 0.0134                         | 0.0310 | 0.0283 | 0.0169 | 0.0306                                  | 0.0111 | 0.0178 | 0.0135 | 0.0179                                   | 0.0228 | 30.2   | 18.0   | 13.6                                    | 32.6   | 29.1   | 12.0   | 11.1                                     | 6.0    | 16.6   | 16.6   | 31.9 | 20.0 | 21.3 | 31.1 | 31.8 | 12.4 | 7.2 | 7.6  | 11.2 | 11.4 |
|           | 3.25           | 0.63   | 1.97   | 2.30   | 1.76   | 2.97   | 0.361  | 0.149  | 0.288                      | 0.289  | 0.292  | 10.89  | 31.42            | 31.66  | 16.76  | 33.95  | 0.0137                         | 0.0309 | 0.0278 | 0.0189 | 0.0323                                  | 0.0096 | 0.0191 | 0.0142 | 0.0189                                   | 0.0226 | 23.3   | 16.4   | 15.7                                    | 32.2   | 24.7   | 9.1    | 11.9                                     | 7.1    | 17.0   | 14.8   | 29.0 | 15.1 | 22.9 | 29.1 | 26.5 | 10.4 | 5.4 | 8.2  | 10.5 | 9.5  |
| 3.15      | 0.74           | 1.62   | 2.32   | 1.63   | 2.96   | 0.368  | 0.157  | 0.274  | 0.289                      | 0.289  | 10.76  | 22.09  | 31.82            | 14.03  | 32.22  | 0.0128 | 0.0210                         | 0.0277 | 0.0166 | 0.0303 | 0.0104                                  | 0.0156 | 0.0144 | 0.0184 | 0.0221                                   | 26.2   | 12.9   | 14.2   | 29.8                                    | 23.4   | 11.1   | 8.8    | 7.3                                      | 16.0   | 14.4   | 29.3   | 15.9 | 20.4 | 27.0 | 24.8 | 10.5 | 5.7  | 7.3 | 9.7  | 8.9  |      |
| 3.05      | 0.78           | 1.62   | 2.25   | 1.62   | 3.04   | 0.353  | 0.236  | 0.281  | 0.296                      | 0.316  | 13.53  | 26.01  | 30.24            | 13.38  | 33.47  | 0.0149 | 0.0260                         | 0.0259 | 0.0164 | 0.0320 | 0.0140                                  | 0.0157 | 0.0150 | 0.0182 | 0.0228                                   | 33.2   | 18.7   | 13.8   | 28.3                                    | 27.6   | 14.4   | 9.4    | 7.6                                      | 14.7   | 15.5   | 34.4   | 24.0 | 19.8 | 28.0 | 29.8 | 12.2 | 8.5  | 7.0 | 10.0 | 10.6 |      |
| 2.95      | 0.78           | 1.69   | 2.03   | 1.72   | 3.12   | 0.419  | 0.228  | 0.277  | 0.239                      | 0.346  | 12.83  | 19.71  | 25.22            | 15.03  | 33.31  | 0.0160 | 0.0187                         | 0.0212 | 0.0171 | 0.0322 | 0.0123                                  | 0.0111 | 0.0153 | 0.0190 | 0.0220                                   | 34.9   | 19.1   | 12.5   | 24.2                                    | 28.8   | 13.3   | 7.9    | 7.8                                      | 14.2   | 15.0   | 40.1   | 23.1 | 18.0 | 22.0 | 32.8 | 14.1 | 8.2  | 6.4 | 8.0  | 11.6 |      |
| 2.85      | 0.70           | 1.69   | 1.78   | 1.75   | 3.13   | 0.438  | 0.173  | 0.286  | 0.273                      | 0.344  | 14.82  | 23.98  | 20.43            | 16.78  | 34.93  | 0.0183 | 0.0225                         | 0.0166 | 0.0191 | 0.0340 | 0.0119                                  | 0.0106 | 0.0135 | 0.0198 | 0.0217                                   | 31.9   | 13.9   | 15.2   | 26.7                                    | 27.5   | 9.6    | 7.0    | 7.7                                      | 14.5   | 14.2   | 40.0   | 17.6 | 20.1 | 26.5 | 32.2 | 14.1 | 6.3  | 7.2 | 9.5  | 11.4 |      |
| 2.75      | 0.71           | 1.68   | 1.71   | 1.85   | 3.38   | 0.366  | 0.214  | 0.293  | 0.319                      | 0.322  | 12.77  | 25.58  | 20.60            | 17.78  | 37.64  | 0.0158 | 0.0246                         | 0.0168 | 0.0200 | 0.0355 | 0.0083                                  | 0.0112 | 0.0130 | 0.0199 | 0.0239                                   | 25.0   | 19.9   | 16.0   | 32.9                                    | 25.8   | 7.9    | 9.0    | 7.5                                      | 17.2   | 15.0   | 32.6   | 21.7 | 21.3 | 30.6 | 29.6 | 11.6 | 7.8  | 7.6 | 10.9 | 10.6 |      |
| 2.65      | 0.59           | 1.76   | 1.65   | 1.89   | 3.33   | 0.307  | 0.212  | 0.240  | 0.325                      | 0.314  | 13.98  | 24.78  | 18.76            | 16.39  | 37.04  | 0.0160 | 0.0234                         | 0.0152 | 0.0186 | 0.0352 | 0.0115                                  | 0.0114 | 0.0141 | 0.0211 | 0.0233                                   | 25.2   | 21.1   | 16.4   | 32.6                                    | 27.1   | 9.7    | 9.8    | 7.7                                      | 17.8   | 15.4   | 29.2   | 21.5 | 22.5 | 30.3 | 29.6 | 10.4 | 7.6  | 8.0 | 10.8 | 10.5 |      |
| 2.55      | 0.69           | 1.85   | 1.55   | 1.97   | 3.21   | 0.413  | 0.253  | 0.280  | 0.310                      | 0.370  | 15.22  | 24.58  | 13.13            | 16.22  | 34.48  | 0.0181 | 0.0225                         | 0.0102 | 0.0187 | 0.0333 | 0.0133                                  | 0.0112 | 0.0157 | 0.0225 | 0.0244                                   | 37.8   | 23.0   | 17.5   | 32.9                                    | 32.8   | 13.6</ |        |                                          |        |        |        |      |      |      |      |      |      |     |      |      |      |

|        |      |      |      |      |      |       |       |       |       |       |       |       |       |       |       |        |        |        |        |        |        |        |        |        |        |      |      |      |      |      |      |      |     |      |      |      |      |      |      |      |      |      |     |     |     |
|--------|------|------|------|------|------|-------|-------|-------|-------|-------|-------|-------|-------|-------|-------|--------|--------|--------|--------|--------|--------|--------|--------|--------|--------|------|------|------|------|------|------|------|-----|------|------|------|------|------|------|------|------|------|-----|-----|-----|
| 40.125 | 0.87 | 2.63 | 1.17 | 2.84 | 4.24 | 0.285 | 0.391 | 0.142 | 0.219 | 0.286 | 15.55 | 29.10 | 22.94 | 17.81 | 43.63 | 0.0163 | 0.0263 | 0.0181 | 0.0196 | 0.0406 | 0.0149 | 0.0266 | 0.0096 | 0.0268 | 0.0320 | 25.0 | 41.6 | 15.6 | 29.1 | 31.5 | 11.2 | 22.8 | 8.3 | 19.5 | 21.4 | 28.9 | 34.8 | 14.3 | 21.7 | 27.2 | 9.7  | 12.0 | 4.8 | 7.3 | 9.3 |
| 40.375 | 0.75 | 2.73 | 1.29 | 2.78 | 4.30 | 0.298 | 0.188 | 0.114 | 0.230 | 0.230 | 14.40 | 30.49 | 25.93 | 17.34 | 43.93 | 0.0138 | 0.0292 | 0.0209 | 0.0198 | 0.0413 | 0.0159 | 0.0196 | 0.0108 | 0.0266 | 0.0322 | 31.4 | 26.0 | 14.9 | 29.6 | 31.4 | 14.6 | 15.8 | 8.9 | 19.7 | 22.2 | 30.2 | 19.0 | 11.5 | 21.8 | 22.9 | 10.2 | 6.4  | 3.9 | 7.3 | 7.7 |
| 40.625 | 0.70 | 2.73 | 1.28 | 2.76 | 4.33 | 0.192 | 0.271 | 0.121 | 0.241 | 0.228 | 7.86  | 32.97 | 26.59 | 17.62 | 43.59 | 0.0078 | 0.0308 | 0.0213 | 0.0199 | 0.0409 | 0.0119 | 0.0205 | 0.0108 | 0.0282 | 0.0328 | 21.6 | 32.8 | 14.4 | 30.3 | 32.9 | 10.7 | 18.4 | 8.6 | 20.2 | 23.2 | 19.5 | 27.5 | 12.3 | 24.1 | 23.0 | 6.5  | 9.4  | 4.1 | 8.1 | 7.7 |
| 40.875 | 0.83 | 2.49 | 1.25 | 2.43 | 3.86 | 0.193 | 0.229 | 0.110 | 0.296 | 0.265 | 11.86 | 30.49 | 24.02 | 12.65 | 35.52 | 0.0118 | 0.0286 | 0.0199 | 0.0139 | 0.0335 | 0.0166 | 0.0192 | 0.0123 | 0.0281 | 0.0318 | 23.1 | 27.7 | 14.0 | 24.6 | 29.5 | 13.0 | 16.1 | 9.2 | 16.1 | 20.6 | 19.6 | 23.2 | 11.1 | 29.1 | 26.4 | 6.5  | 7.9  | 3.7 | 9.8 | 8.9 |
| 41.125 | 0.58 | 2.41 | 1.03 | 3.29 | 3.72 | 0.213 | 0.109 | 0.133 | 0.209 | 0.209 | 8.02  | 32.17 | 19.30 | 13.61 | 23.38 | 0.0103 | 0.0307 | 0.0165 | 0.0162 | 0.0242 | 0.0078 | 0.0144 | 0.0053 | 0.0376 | 0.0361 | 17.4 | 14.2 | 12.4 | 40.5 | 35.5 | 6.7  | 10.0 | 5.2 | 28.4 | 25.7 | 21.5 | 10.5 | 13.5 | 21.0 | 21.0 | 7.2  | 3.5  | 4.5 | 7.0 | 7.0 |

Table Sup3

|    |      | $d/CO_2^{SST}$ | $d/CO_2^{SSS}$ | $d/CO_2^{AT}$ | $d/CO_2^{CT}$ | $d/CO_2/dt$ (sum) | $d/CO_2/dt$ (obs) |
|----|------|----------------|----------------|---------------|---------------|-------------------|-------------------|
| S1 | 2019 | 0.25           | 0.23           | 0.74          | 0.78          | 1.13              | 1.15              |
|    | 2020 | 1.90           | 0.56           | 1.82          | 1.67          | 3.17              | 1.74              |
|    | 2021 | 4.29           | 0.32           | 1.01          | 2.04          | 4.87              | 3.00              |
|    | 2022 | 0.97           | 0.14           | 0.42          | 0.81          | 1.34              | 0.36              |
|    | 2023 | 6.44           | 0.99           | 1.62          | 2.86          | 7.30              | 2.29              |
| S2 | 2019 | 1.23           | 0.01           | 0.17          | 1.31          | 1.80              | 0.82              |
|    | 2020 | 4.77           | 0.08           | 1.03          | 1.68          | 5.17              | 3.97              |
|    | 2021 | 2.90           | 0.06           | 0.64          | 2.70          | 4.01              | 2.70              |
|    | 2022 | 1.50           | 0.04           | 0.31          | 1.22          | 1.95              | 1.32              |
|    | 2023 | 3.96           | 0.53           | 1.58          | 2.26          | 4.85              | 3.75              |
| S3 | 2019 | 2.36           | 0.15           | 1.44          | 2.16          | 3.51              | 2.68              |
|    | 2020 | 3.67           | 0.11           | 1.21          | 1.54          | 4.16              | 3.50              |
|    | 2021 | 3.89           | 0.13           | 1.29          | 2.07          | 4.59              | 3.22              |
|    | 2022 | 1.28           | 0.09           | 0.70          | 1.11          | 1.83              | 0.99              |
|    | 2023 | 4.66           | 0.56           | 1.78          | 2.64          | 5.67              | 3.75              |
| S4 | 2019 | 1.34           | 0.03           | 1.34          | 2.03          | 2.78              | 2.11              |
|    | 2020 | 6.38           | 0.00           | 2.76          | 2.59          | 7.42              | 5.21              |
|    | 2021 | 4.77           | 0.00           | 1.56          | 1.97          | 5.39              | 4.08              |
|    | 2022 | 2.12           | 0.02           | 0.96          | 1.15          | 2.60              | 1.85              |
|    | 2023 | 6.84           | 0.24           | 2.69          | 5.01          | 8.90              | 6.80              |
| S5 | 2019 | 1.81           | 0.07           | 0.66          | 1.86          | 2.68              | 2.93              |
|    | 2020 | 3.66           | 0.02           | 3.03          | 2.34          | 5.30              | 3.03              |
|    | 2021 | 2.85           | 0.16           | 2.22          | 2.61          | 4.46              | 1.06              |
|    | 2022 | 2.35           | 0.15           | 1.28          | 1.04          | 2.87              | 2.00              |
|    | 2023 | 8.10           | 0.82           | 4.28          | 4.73          | 10.35             | 4.15              |
| E1 | 2019 | 1.77           | 0.10           | 1.54          | 1.51          | 2.79              | 3.20              |
|    | 2020 | 3.43           | 0.10           | 0.98          | 2.28          | 4.23              | 2.87              |
|    | 2021 | 2.59           | 0.19           | 1.52          | 2.82          | 4.13              | 1.38              |
|    | 2022 | 2.25           | 0.09           | 0.68          | 2.08          | 3.14              | 2.36              |
|    | 2023 | 7.62           | 0.62           | 3.40          | 3.43          | 9.04              | 5.56              |
| E2 | 2019 | 1.56           | 0.64           | 1.99          | 1.67          | 3.09              | 3.19              |
|    | 2020 | 3.43           | 0.44           | 1.47          | 1.85          | 4.19              | 4.17              |
|    | 2021 | 2.74           | 0.57           | 2.13          | 3.04          | 4.65              | 1.77              |
|    | 2022 | 2.28           | 0.10           | 0.45          | 2.41          | 3.35              | 2.44              |
|    | 2023 | 4.19           | 0.75           | 3.74          | 3.84          | 6.85              | 3.71              |
| E3 | 2019 | 2.16           | 0.37           | 1.38          | 2.42          | 3.55              | 3.93              |
|    | 2020 | 3.29           | 0.42           | 2.64          | 3.38          | 5.42              | 4.39              |
|    | 2021 | 3.16           | 0.27           | 2.72          | 3.56          | 5.49              | 1.92              |
|    | 2022 | 2.44           | 0.03           | 0.42          | 2.61          | 3.60              | 2.65              |
|    | 2023 | 5.58           | 0.43           | 3.49          | 4.44          | 7.96              | 4.05              |
| E4 | 2019 | 2.47           | 0.25           | 1.43          | 1.71          | 3.34              | 3.90              |
|    | 2020 | 3.41           | 0.56           | 2.48          | 2.74          | 5.06              | 5.02              |
|    | 2021 | 2.32           | 0.72           | 2.90          | 3.73          | 5.32              | 1.55              |
|    | 2022 | 2.55           | 0.25           | 1.03          | 2.51          | 3.73              | 2.57              |
|    | 2023 | 3.60           | 1.14           | 2.41          | 3.01          | 5.39              | 3.07              |
| E5 | 2019 | 2.50           | 0.13           | 0.54          | 1.46          | 2.94              | 3.47              |
|    | 2020 | 3.09           | 0.31           | 1.18          | 2.01          | 3.88              | 3.24              |
|    | 2021 | 2.55           | 0.34           | 1.28          | 2.71          | 3.95              | 1.05              |
|    | 2022 | 2.54           | 0.15           | 0.65          | 2.61          | 3.71              | 2.82              |
|    | 2023 | 4.74           | 0.86           | 1.99          | 2.82          | 5.93              | 3.45              |
| E6 | 2019 | 2.76           | 0.52           | 1.02          | 1.67          | 3.42              | 1.65              |
|    | 2020 | 4.63           | 0.57           | 1.15          | 1.62          | 5.07              | 4.36              |
|    | 2021 | 2.11           | 0.84           | 2.11          | 2.58          | 4.04              | 1.78              |
|    | 2022 | 2.59           | 0.06           | 0.21          | 1.73          | 3.12              | 2.51              |
|    | 2023 | 2.83           | 0.20           | 1.34          | 2.51          | 4.01              | 1.87              |

Table Sup4

|      |        | FCO <sub>2</sub> (mol m <sup>-2</sup> yr <sup>-1</sup> ) |      |      |      |      |      |      |      |      |      |      | ΔfCO <sub>2</sub> (μatm) |       |       |       |       |       |       |       |       |       | Wind speed (m s <sup>-1</sup> ) |     |     |     |     |     |     |     |     |     |     |     |
|------|--------|----------------------------------------------------------|------|------|------|------|------|------|------|------|------|------|--------------------------|-------|-------|-------|-------|-------|-------|-------|-------|-------|---------------------------------|-----|-----|-----|-----|-----|-----|-----|-----|-----|-----|-----|
|      |        | S1                                                       | S2   | S3   | S4   | S5   | E1   | E2   | E3   | E4   | E5   | E6   | S1                       | S2    | S3    | S4    | S5    | E1    | E2    | E3    | E4    | E5    | E6                              | S1  | S2  | S3  | S4  | S5  | E1  | E2  | E3  | E4  | E5  | E6  |
| 2019 | Annual | 0.20                                                     | 0.48 | 0.38 | 0.76 | 0.82 | 0.90 | 1.02 | 1.04 | 0.88 | 0.85 | 0.92 | 9.04                     | 17.63 | 14.24 | 36.27 | 31.95 | 49.01 | 55.87 | 61.14 | 59.62 | 57.64 | 65.01                           | 0.9 | 1.0 | 0.9 | 0.8 | 0.9 | 0.8 | 0.8 | 0.7 | 0.7 | 0.8 | 1.2 |
|      | Winter | 0.02                                                     | 0.32 | 0.29 | 0.26 | 0.30 | 0.14 | 0.10 | 0.14 | 0.12 | 0.19 | 0.35 | 5.25                     | 4.42  | 3.25  | 0.27  | 4.41  | 3.32  | 7.34  | 0.55  | 1.20  | 4.49  | 0.66                            | 0.7 | 0.9 | 0.7 | 0.7 | 0.7 | 0.5 | 0.3 | 0.3 | 0.4 | 0.3 | 0.6 |
|      | Spring | 0.16                                                     | 0.47 | 0.43 | 0.61 | 0.79 | 0.76 | 0.67 | 0.81 | 0.61 | 0.69 | 0.35 | 1.24                     | 10.97 | 8.69  | 20.34 | 25.08 | 31.22 | 31.34 | 40.03 | 34.95 | 39.39 | 34.59                           | 0.6 | 0.7 | 0.7 | 0.6 | 0.6 | 0.5 | 0.4 | 0.4 | 0.4 | 0.4 | 0.1 |
|      | Summer | 0.09                                                     | 0.17 | 0.24 | 0.31 | 0.54 | 0.58 | 0.47 | 0.57 | 0.40 | 0.44 | 0.32 | 3.36                     | 0.49  | 1.36  | 9.22  | 10.73 | 13.53 | 13.43 | 17.49 | 15.27 | 15.17 | 17.86                           | 0.5 | 0.6 | 0.7 | 0.5 | 0.6 | 0.4 | 0.4 | 0.4 | 0.5 | 0.5 | 0.7 |
|      | Autumn | 0.06                                                     | 0.04 | 0.10 | 0.22 | 0.15 | 0.20 | 0.42 | 0.31 | 0.35 | 0.25 | 0.58 | 8.88                     | 10.05 | 8.27  | 22.44 | 12.28 | 26.11 | 34.04 | 31.51 | 35.19 | 28.60 | 41.73                           | 0.6 | 0.7 | 0.7 | 0.6 | 0.7 | 0.5 | 0.4 | 0.4 | 0.5 | 0.5 | 0.4 |
| 2020 | Annual | 0.51                                                     | 0.71 | 0.68 | 0.83 | 0.82 | 0.91 | 0.97 | 0.96 | 0.82 | 0.81 | 0.81 | 12.58                    | 26.47 | 24.14 | 32.35 | 33.20 | 46.51 | 50.07 | 52.61 | 50.25 | 51.42 | 55.46                           | 1.0 | 1.1 | 0.9 | 0.8 | 0.8 | 0.9 | 0.7 | 0.7 | 0.8 | 0.8 | 0.9 |
|      | Winter | 0.24                                                     | 0.36 | 0.29 | 0.40 | 0.20 | 0.12 | 0.04 | 0.05 | 0.08 | 0.10 | 0.18 | 3.05                     | 4.48  | 3.39  | 5.03  | 2.08  | 2.63  | 2.60  | 1.20  | 2.24  | 2.80  | 5.30                            | 0.5 | 0.6 | 0.4 | 0.7 | 0.5 | 0.5 | 0.3 | 0.3 | 0.4 | 0.3 | 0.4 |
|      | Spring | 0.47                                                     | 0.67 | 0.59 | 0.76 | 0.73 | 0.76 | 0.75 | 0.73 | 0.62 | 0.65 | 0.39 | 9.40                     | 19.92 | 16.48 | 23.43 | 23.61 | 30.91 | 33.47 | 36.37 | 33.74 | 37.20 | 36.61                           | 0.5 | 0.7 | 0.6 | 0.5 | 0.5 | 0.6 | 0.5 | 0.5 | 0.6 | 0.6 | 0.3 |
|      | Summer | 0.17                                                     | 0.24 | 0.17 | 0.33 | 0.40 | 0.46 | 0.45 | 0.45 | 0.37 | 0.38 | 0.21 | 1.97                     | 6.17  | 3.95  | 9.93  | 9.63  | 14.61 | 16.75 | 19.00 | 16.81 | 18.39 | 16.62                           | 0.4 | 0.5 | 0.3 | 0.2 | 0.3 | 0.4 | 0.3 | 0.3 | 0.4 | 0.4 | 0.3 |
|      | Autumn | 0.09                                                     | 0.11 | 0.19 | 0.14 | 0.20 | 0.25 | 0.34 | 0.34 | 0.29 | 0.26 | 0.52 | 5.58                     | 11.66 | 12.68 | 14.01 | 15.50 | 22.93 | 24.04 | 23.74 | 24.01 | 22.02 | 27.49                           | 0.3 | 0.3 | 0.3 | 0.2 | 0.2 | 0.3 | 0.2 | 0.2 | 0.2 | 0.3 | 0.7 |
| 2021 | Annual | 0.71                                                     | 0.92 | 0.94 | 0.95 | 0.95 | 1.12 | 1.05 | 0.99 | 0.89 | 0.91 | 0.77 | 16.09                    | 29.13 | 24.95 | 30.03 | 36.24 | 46.39 | 48.87 | 48.56 | 48.21 | 49.29 | 52.72                           | 1.0 | 1.0 | 0.9 | 0.8 | 0.8 | 0.9 | 0.8 | 0.8 | 0.8 | 0.7 | 0.7 |
|      | Winter | 0.19                                                     | 0.33 | 0.21 | 0.34 | 0.12 | 0.17 | 0.11 | 0.10 | 0.06 | 0.07 | 0.07 | 4.09                     | 6.94  | 3.65  | 4.18  | 3.04  | 2.34  | 1.35  | 2.17  | 2.30  | 1.67  | 4.74                            | 0.2 | 0.2 | 0.1 | 0.7 | 0.1 | 0.2 | 0.3 | 0.3 | 0.2 | 0.1 | 0.2 |
|      | Spring | 0.54                                                     | 0.80 | 0.71 | 0.80 | 0.70 | 0.78 | 0.76 | 0.67 | 0.62 | 0.64 | 0.46 | 10.66                    | 23.46 | 19.14 | 20.44 | 25.99 | 31.39 | 33.45 | 32.80 | 33.39 | 35.46 | 36.84                           | 0.7 | 0.7 | 0.6 | 0.7 | 0.6 | 0.8 | 0.8 | 0.8 | 0.7 | 0.6 | 0.3 |
|      | Summer | 0.11                                                     | 0.26 | 0.16 | 0.21 | 0.25 | 0.29 | 0.30 | 0.27 | 0.29 | 0.29 | 0.17 | 3.41                     | 9.98  | 7.22  | 8.67  | 11.30 | 15.19 | 17.22 | 17.53 | 19.10 | 19.61 | 17.77                           | 0.2 | 0.2 | 0.2 | 0.1 | 0.3 | 0.3 | 0.4 | 0.4 | 0.4 | 0.3 | 0.1 |
|      | Autumn | 0.30                                                     | 0.26 | 0.42 | 0.30 | 0.43 | 0.54 | 0.48 | 0.50 | 0.42 | 0.41 | 0.46 | 7.80                     | 10.03 | 10.33 | 14.28 | 16.31 | 22.17 | 22.51 | 22.44 | 20.80 | 20.34 | 23.78                           | 0.5 | 0.5 | 0.5 | 0.1 | 0.3 | 0.3 | 0.1 | 0.1 | 0.2 | 0.2 | 0.5 |
| 2022 | Annual | 0.54                                                     | 0.81 | 0.74 | 0.78 | 0.92 | 1.04 | 1.01 | 0.98 | 0.85 | 0.81 | 0.74 | 15.01                    | 28.97 | 24.78 | 30.99 | 38.74 | 47.99 | 50.06 | 51.40 | 49.93 | 49.75 | 51.78                           | 0.6 | 0.6 | 0.6 | 0.4 | 0.6 | 0.5 | 0.5 | 0.4 | 0.4 | 0.4 | 0.6 |
|      | Winter | 0.10                                                     | 0.23 | 0.16 | 0.19 | 0.11 | 0.13 | 0.14 | 0.13 | 0.08 | 0.05 | 0.12 | 1.24                     | 3.82  | 2.71  | 1.81  | 3.84  | 4.84  | 5.08  | 4.07  | 2.38  | 1.31  | 1.74                            | 0.1 | 0.2 | 0.1 | 0.2 | 0.2 | 0.1 | 0.1 | 0.1 | 0.0 | 0.0 | 0.3 |
|      | Spring | 0.33                                                     | 0.64 | 0.54 | 0.67 | 0.66 | 0.67 | 0.62 | 0.61 | 0.54 | 0.56 | 0.41 | 7.72                     | 20.59 | 17.34 | 22.46 | 28.74 | 30.13 | 31.38 | 33.46 | 32.92 | 34.98 | 34.88                           | 0.3 | 0.4 | 0.4 | 0.3 | 0.3 | 0.3 | 0.3 | 0.3 | 0.3 | 0.3 | 0.2 |
|      | Summer | 0.04                                                     | 0.14 | 0.11 | 0.27 | 0.22 | 0.26 | 0.25 | 0.25 | 0.24 | 0.25 | 0.20 | 3.56                     | 6.30  | 4.94  | 10.30 | 11.03 | 13.45 | 14.20 | 15.86 | 15.98 | 17.58 | 15.92                           | 0.1 | 0.1 | 0.0 | 0.1 | 0.1 | 0.0 | 0.1 | 0.1 | 0.1 | 0.1 | 0.2 |
|      | Autumn | 0.31                                                     | 0.30 | 0.33 | 0.20 | 0.41 | 0.53 | 0.54 | 0.52 | 0.43 | 0.38 | 0.43 | 9.95                     | 13.41 | 11.81 | 13.15 | 16.36 | 25.39 | 26.37 | 25.54 | 24.22 | 21.72 | 24.73                           | 0.4 | 0.2 | 0.3 | 0.1 | 0.4 | 0.3 | 0.2 | 0.2 | 0.2 | 0.2 | 0.4 |
| 2023 | Annual | 0.60                                                     | 0.88 | 0.83 | 0.82 | 0.97 | 1.20 | 1.03 | 1.05 | 0.93 | 0.85 | 0.72 | 17.78                    | 33.27 | 31.95 | 38.29 | 45.98 | 50.05 | 48.52 | 51.81 | 50.67 | 48.40 | 48.59                           | 1.0 | 0.9 | 0.9 | 0.6 | 0.9 | 0.9 | 0.8 | 0.8 | 0.7 | 0.7 | 0.7 |
|      | Winter | 0.18                                                     | 0.12 | 0.18 | 0.14 | 0.17 | 0.23 | 0.23 | 0.24 | 0.16 | 0.16 | 0.04 | 1.39                     | 4.46  | 3.28  | 3.96  | 8.00  | 6.14  | 6.44  | 6.32  | 3.85  | 4.33  | 2.20                            | 0.5 | 0.4 | 0.4 | 0.3 | 0.7 | 0.5 | 0.4 | 0.4 | 0.4 | 0.3 | 0.3 |
|      | Spring | 0.22                                                     | 0.58 | 0.50 | 0.70 | 0.60 | 0.67 | 0.53 | 0.54 | 0.54 | 0.50 | 0.46 | 10.05                    | 24.36 | 24.13 | 31.68 | 37.60 | 30.12 | 29.08 | 32.10 | 34.22 | 32.93 | 31.66                           | 0.3 | 0.4 | 0.3 | 0.2 | 0.4 | 0.4 | 0.4 | 0.3 | 0.3 | 0.3 | 0.5 |
|      | Summer | 0.16                                                     | 0.12 | 0.06 | 0.42 | 0.13 | 0.22 | 0.15 | 0.16 | 0.19 | 0.18 | 0.18 | 3.57                     | 8.76  | 10.34 | 21.65 | 16.83 | 13.81 | 12.69 | 14.95 | 17.76 | 18.65 | 16.01                           | 0.5 | 0.5 | 0.4 | 0.4 | 0.5 | 0.5 | 0.4 | 0.4 | 0.3 | 0.3 | 0.3 |
|      | Autumn | 0.47                                                     | 0.48 | 0.49 | 0.19 | 0.57 | 0.75 | 0.69 | 0.70 | 0.56 | 0.49 | 0.39 | 11.27                    | 14.99 | 13.28 | 9.49  | 15.75 | 27.82 | 27.33 | 27.70 | 23.57 | 21.32 | 24.11                           | 0.8 | 0.5 | 0.6 | 0.4 | 0.8 | 0.5 | 0.5 | 0.4 | 0.4 | 0.4 | 0.2 |
